1 **The vaginal microbiota of pregnant women varies with gestational age, maternal age, and**  
2 **parity**

3

4 **Short title: Vaginal microbiota across term pregnancy**

5

6 Roberto Romero<sup>a,b,c,d,e,\*</sup>, Kevin R. Theis<sup>a,f,g,\*</sup>, Nardhy Gomez-Lopez<sup>a,f,g</sup>, Andrew D. Winters<sup>a,g</sup>,

7 Jonathan Panzer<sup>a,g</sup>, Huang Lin<sup>h</sup>, Jose Galaz<sup>a,f</sup>, Jonathan M. Greenberg<sup>a,f</sup>, Zachary Shaffer<sup>a,i</sup>,

8 David J. Kracht<sup>a,f</sup>, Tinnakorn Chaiworapongsa<sup>a,f</sup>, Eunjung Jung<sup>a,f</sup>, Francesca Gotsch<sup>a,f</sup>, Jacques

9 Ravel<sup>j,k</sup>, Shyamal D. Peddada<sup>l</sup>, Adi L. Tarca<sup>a,f,m,\*</sup>

10

11 <sup>a</sup> Perinatology Research Branch, Division of Obstetrics and Maternal-Fetal Medicine, Division of

12 Intramural Research, *Eunice Kennedy Shriver* National Institute of Child Health and Human

13 Development, National Institutes of Health, U.S. Department of Health and Human Services,

14 Detroit, Michigan, USA

15 <sup>b</sup> Department of Obstetrics and Gynecology, University of Michigan, Ann Arbor, Michigan,

16 USA

17 <sup>c</sup> Department of Epidemiology and Biostatistics, Michigan State University, East Lansing,

18 Michigan, USA

19 <sup>d</sup> Center for Molecular Medicine and Genetics, Wayne State University School of Medicine,

20 Detroit, Michigan, USA

21 <sup>e</sup> Detroit Medical Center, Detroit, Michigan, USA

22 <sup>f</sup> Department of Obstetrics and Gynecology, Wayne State University School of Medicine,

23 Detroit, Michigan, USA

24 <sup>g</sup> Department of Biochemistry, Microbiology, and Immunology, Wayne State University School  
25 of Medicine, Detroit, Michigan, USA

26 <sup>h</sup> Department of Biostatistics, Graduate School of Public Health, University of Pittsburgh,  
27 Pittsburgh, Pennsylvania, USA

28 <sup>i</sup> Department of Physiology, Wayne State University School of Medicine, Detroit, Michigan,  
29 USA

30 <sup>j</sup> Institute for Genome Sciences, University of Maryland School of Medicine, Baltimore,  
31 Maryland, USA

32 <sup>k</sup> Department of Microbiology and Immunology, University of Maryland School of Medicine,  
33 Baltimore, Maryland, USA

34 <sup>l</sup> Biostatistics and Bioinformatics Branch, National Institute of Child Health and Human  
35 Development, Bethesda, Maryland, USA

36 <sup>m</sup> Department of Computer Science, Wayne State University College of Engineering, Detroit,  
37 Michigan, USA

38

39 \* Corresponding authors

40 Roberto Romero [prbchiefstaff@med.wayne.edu](mailto:prbchiefstaff@med.wayne.edu)

41 Kevin R. Theis [ktheis@med.wayne.edu](mailto:ktheis@med.wayne.edu)

42 Adi Tarca [atarca@med.wayne.edu](mailto:atarca@med.wayne.edu)

43 **ABSTRACT**

44 The composition of the vaginal microbiota is heavily influenced by pregnancy and may factor into  
45 pregnancy complications, including spontaneous preterm birth. However, results among studies  
46 have been inconsistent, due in part to variation in sample sizes and ethnicity. Thus an association  
47 between the vaginal microbiota and preterm labor continues to be debated. Yet, before assessing  
48 associations between the composition of the vaginal microbiota and preterm labor, a robust and  
49 in-depth characterization of the vaginal microbiota throughout pregnancy in the specific study  
50 population under investigation is required. Herein, we report a large longitudinal study (N = 474  
51 women, 1862 vaginal samples) of a primarily African-American cohort– which experiences a  
52 relatively high rate of pregnancy complications – evaluating associations between individual  
53 identity, gestational age, and other maternal characteristics with the composition of the vaginal  
54 microbiota throughout gestation resulting in term delivery. The primary factors influencing the  
55 composition of the vaginal microbiota in pregnancy are individual identity and gestational age at  
56 sampling. Secondary factors are maternal age, parity, obesity, and self-reported *Cannabis* use. The  
57 principal pattern across gestation is for the vaginal microbiota to remain or transition to a state of  
58 *Lactobacillus* dominance. This pattern can be mitigated by maternal parity and obesity.  
59 Regardless, network analyses reveal dynamic associations among specific bacterial taxa within the  
60 vaginal ecosystem, which shift throughout the course of pregnancy. This study provides a robust  
61 foundational understanding of the vaginal microbiota in pregnancy among African-Americans, in  
62 particular, and sets the stage for further investigation of this microbiota in obstetrical disease.

63

64

65 **IMPORTANCE**

66 There is debate regarding links between the vaginal microbiota and pregnancy complications,  
67 especially spontaneous preterm birth. Inconsistencies in results among studies are likely due to  
68 differences in sample sizes and cohort ethnicity. Ethnicity is a complicating factor because,  
69 although all bacterial taxa commonly inhabiting the vagina are present among all ethnicities, the  
70 frequencies of these taxa vary among ethnicities. Therefore, an in-depth characterization of the  
71 vaginal microbiota throughout pregnancy in the specific study population under investigation is  
72 required prior to evaluating associations between the vaginal microbiota and obstetrical disease.  
73 This initial investigation is a large longitudinal study of the vaginal microbiota throughout  
74 gestation resulting in a term delivery in a primarily African-American cohort, a population that  
75 experiences disproportionately negative maternal-fetal health outcomes. It establishes the  
76 magnitude of associations between maternal characteristics, such as age, parity, BMI, and self-  
77 reported *Cannabis* use, on the vaginal microbiota in pregnancy.

78

79 **KEYWORDS**

80 *Cannabis*, *Gardnerella*, gestation, *Lactobacillus*, microbiome, obesity, term gestation

## 81 INTRODUCTION

82 The composition of the vaginal microbiota is broadly consistent across populations of reproductive  
83 age women ([1-5](#)). In general, the vaginal microbiota can be categorized into five primary  
84 community state types (CSTs) that are defined by a predominance, or a lack thereof, of  
85 *Lactobacillus* spp. ([1-9](#)). Four of these CSTs are dominated by *Lactobacillus* spp. (*L. crispatus* -  
86 CST I, *L. gasseri* - CST II, *L. iners* - CST III, *L. jensenii* - CST V) and the other CST (CST IV) is  
87 typically not dominated by any one bacterium, but rather is comprised of a diverse array of  
88 microorganisms ([4-6](#), [8-10](#)). CST IV has been further subcategorized as CST IV-A or CST IV-B  
89 ([11](#)). CST IV-A is characterized by high relative abundances of *Candidatus Lachnocurva vaginae*  
90 (formerly Bacterial Vaginosis-Associated Bacterium 1, or BVAB1 ([12](#))) *Gardnerella vaginalis*,  
91 and *L. iners*, whereas CST IV-B has high relative abundances of *Atopobium vaginae*, *G. vaginalis*,  
92 and *L. iners* ([5](#), [11](#)). Importantly, the *Lactobacillus*-dominated CSTs (I, II, III, V), and especially  
93 CST I, which is dominated by *L. crispatus*, are associated with optimal vaginal health ([13-19](#)) and  
94 positive reproductive outcomes ([20-29](#)). In contrast, CST IV-A and CST IV-B have been  
95 associated with bacterial vaginosis ([7](#), [13](#), [30-35](#)) and, among pregnant women, CST IV ([23](#), [25](#),  
96 [36-38](#)), CST IV-associated bacteria ([23](#), [25-29](#), [38-41](#)), and/or a greater vaginal microbiota  
97 diversity in general ([22](#)), have been associated with an increase in the risk of spontaneous preterm  
98 birth (sPTB) – the leading cause of neonatal mortality and morbidity worldwide ([42](#), [43](#)).  
99 Nevertheless, non-pregnant and pregnant women alike with vaginal microbiotas classified as CST  
100 IV can be asymptomatic ([4](#), [44](#)), and their reproductive health and pregnancy outcomes are  
101 generally normal. Therefore, the strength and clinical relevance of associations between vaginal  
102 CSTs and female reproductive health and pregnancy outcomes remains unclear ([45](#)).

103 Ethnicity is a complicating factor in such studies as it is associated with the structure of the  
104 vaginal microbiota – all CSTs are present among all ethnicities, yet the frequencies of the CSTs  
105 among ethnicities vary ([2-4](#), [22](#), [46-48](#)). For example, African American and Hispanic women are  
106 more likely to exhibit CST IV vaginal communities, whereas Caucasian and Asian women tend to  
107 more frequently display *Lactobacillus*-dominated CSTs ([2-4](#)). Overall, regardless ethnicity, the  
108 composition of the vaginal microbiota can be highly labile and some of the factors influencing this  
109 lability include the menstrual cycle ([5](#), [49-54](#)), sexual activity ([55-57](#)), and pregnancy ([58](#)). The  
110 menstrual cycle appears to have a stabilizing effect on the composition of the vaginal microbiota,  
111 an affect that has been attributed to high estrogen levels, which favor the proliferation of  
112 *Lactobacillus* spp. ([5](#), [49-54](#)). Conversely, sexual activity increases the likelihood of CST IV  
113 vaginal communities ([57](#)) and decreases the presence of potentially protective *L. crispatus* ([56](#)).  
114 Pregnancy, a vulnerable period accommodating the growth and development of the fetus, and that  
115 includes a drastic rise in steroid hormones (e.g. progesterone and estrogen) ([59](#), [60](#)), also favors  
116 the presence of *Lactobacillus*-dominated CSTs in the vagina ([44](#), [58](#)). Indeed, we previously  
117 reported that the vaginal microbiota in pregnancy differs from that in non-pregnant women ([58](#)).  
118 Specifically, pregnant women have higher relative abundances of *L. vaginalis*, *L. crispatus*, *L.*  
119 *gasseri* and *L. jensenii*, and lower abundances of 22 other non-*Lactobacillus* phylotypes ([58](#)). In  
120 addition, the vaginal microbiota of pregnant women is typically more stable (i.e., consistent across  
121 time) than that of non-pregnant women ([58](#)). These general findings have been replicated by other  
122 investigators ([20](#), [21](#), [48](#)). Therefore, it has been proposed that increased stability of the vaginal  
123 microbiota and *Lactobacillus*-dominance during pregnancy play a protective role and reduce the  
124 likelihood of pregnancy complications, especially sPTB ([47](#), [61](#)). However, the association  
125 between variation in the composition of the vaginal microbiota and preterm birth continues to be

126 debated ([45](#), [62-64](#)). Potential explanations for the inconsistencies in results among published  
127 studies include differences in sample sizes and cohort ethnicity. Therefore, before evaluating  
128 associations between the composition of the vaginal microbiota and obstetrical disease, including  
129 sPTB, a robust and in-depth characterization of the vaginal microbiota throughout pregnancy in  
130 the specific study population under investigation is required.

131 This initial investigation focuses on an urban population that experiences a high risk of  
132 pregnancy complications ([65-75](#)). It uses 16S rRNA gene amplicon sequencing to assess the  
133 trajectory of the composition of the vaginal microbiota throughout gestation ending in term  
134 delivery. Leveraging longitudinal samples from a large set of patients with well-characterized  
135 demographic and clinical data, this study establishes the magnitude of associations between  
136 maternal characteristics, such as age, parity, and ethnicity on the vaginal microbiota. Such  
137 knowledge is important for the assessment of previous reports and for informing future analyses  
138 of the vaginal microbiota in relationship to obstetrical complications, especially sPTB. Moreover,  
139 this study provides information on a primarily African American population, for which available  
140 data are overall sparse despite this population experiencing disproportionately negative maternal-  
141 fetal health outcomes ([65-75](#)).

142

143

## 144 RESULTS AND DISCUSSION

145 The demographic characteristics of the 474 patients with term delivery included in this study (the  
146 largest cohort sampled to date) are presented in **Table 1**. This cohort is primarily African-  
147 American [94.5% (448/474)] with a body mass index (BMI) above 25 kg/m<sup>2</sup> [65% (306/472)].  
148 The distribution of the gestational ages at which the 1862 vaginal fluids were collected from these  
149 patients is depicted in **Figure 1**. Each woman had 3 to 4 samples (median of 4) collected between  
150 8 and 38<sup>+6</sup> weeks of gestation.

151

### 152 *Effect of patient/subject identity*

153 The structure of the vaginal microbiota during pregnancy has been reported to vary with  
154 gestational and maternal age ([47](#), [48](#), [58](#)). However, the scope and strength of all factors potentially  
155 influencing the structure and fluidity of the vaginal microbiota during pregnancy remain to be  
156 elucidated. In the current study, beta diversity, or the shared diversity of the microbiota between  
157 samples, was characterized using the Jaccard (i.e., microbiota composition) and Bray-Curtis (i.e.,  
158 microbiota structure) indices. The variation in vaginal microbiota composition and structure was  
159 primarily explained by patient identity (SubjectID: composition - R<sup>2</sup>=58%-61%; structure -  
160 R<sup>2</sup>=65%-68%) and by the patient-specific variation with gestational age (interaction between  
161 SubjectID and Gestational age: composition - R<sup>2</sup>=16%-18%; structure - R<sup>2</sup>=14%-16%). Only  
162 relatively modest percentages of the variance in the composition and structure of the vaginal  
163 microbiota were explained by maternal characteristics, such as age (0.2%-1.4%), parity (0.3%-  
164 1.9%), and self-reported *Cannabis* use (0.3%-1.8%). Overall, these findings illustrate the large  
165 influence that patient (i.e., individual) identity has on the composition and structure of the vaginal  
166 microbiota, which is consistent with general observations of microbiotas at other body sites, such



167 as the oral cavity, gut, and skin ([76-81](#)). Furthermore, this highlights the importance of robust  
168 longitudinal, as opposed to cross-sectional, studies to account for inter- and intra-individual  
169 variability in the microbiota ([80](#), [82-84](#)).

170

### 171 *Effect of gestational age*

172 Alpha diversity, which is the diversity of the microbiota within individual samples, was  
173 characterized using Chao1 (i.e., richness) and Shannon and Simpson (i.e., evenness) indices. Both  
174 richness (**Figure 2A,C**) and evenness (**Figure 2B,D**) of the vaginal microbiota decreased with  
175 advancing gestational age from the first to the third trimester ( $p < 0.0001$  for all). This is consistent  
176 with previous reports of alpha diversity in cohorts of primarily African-Americans ([28](#), [48](#), [58](#)). In  
177 contrast, previous reports of largely Caucasian cohorts indicated that alpha diversity is generally  
178 low and consistent throughout the entirety of gestation ([23](#), [47](#), [48](#), [85](#)). Nevertheless, in the current  
179 study, there was substantial heterogeneity in the rate of decrease in vaginal microbiota alpha  
180 diversity among patients – the decrease was steeper for women who had higher baseline diversity  
181 early in pregnancy (correlation between random intercepts and random slopes: Shannon -0.79,  
182 Simpson -0.67, Chao1 = -0.67) (see for example **Figure 3**). The decrease in alpha diversity with  
183 advancing gestational age remained significant after adjusting for potential confounding variables,  
184 including maternal age, parity, and BMI (**Table 2**). These alterations in the overall structure of the  
185 vaginal microbiota likely reflect physiological alterations (e.g., glycogen levels ([5](#), [86](#), [87](#))) in the  
186 vaginal microenvironment across gestation that favor the predominance of a few bacterial taxa that  
187 can thrive in these conditions (e.g. *Lactobacillus* spp.).

188 The vaginal microbiota is consistently categorized into CSTs that are defined by a  
189 dominance or lack thereof of *Lactobacillus* spp. ([4](#), [11](#), [23](#), [44](#)). Using a previously established

190 protocol for assigning CSTs to vaginal samples based on 16S rRNA gene sequence data ([11](#)), we  
191 identified seven CSTs among the 1862 samples included in this study (**Figure 4A**). These CSTs  
192 included four dominated by *L. crispatus* (I), *L. gasseri* (II), *L. iners* (III), or *L. jensenii* (V), and  
193 three more diverse CSTs (CST IV) comprised of *L. iners*, *Gardnerella* sp., and *Megasphaera* sp.,  
194 with *Ca. Lachnocurva vaginae*, *Atopobium vaginae*, and *Bifidobacterium* sp. being relatively  
195 abundant in CST IV-A, -B, and -C, respectively. These CSTs are consistent with previous  
196 investigations of the vaginal microbiota in smaller cohorts ([27](#), [29](#), [36](#), [39-41](#), [44](#), [47](#), [58](#), [85](#), [88-](#)  
197 [94](#)), further illustrating the depth of complexity of CST IV-designated communities.

198 In this study, CST prevalence was a function of gestational age (**Figure 4B**). Except for  
199 the two least abundant CSTs (II and IV-C), for which statistical power was inherently limited, the  
200 membership probability to any CST displayed dynamic changes with gestational age ( $p < 0.05$  for  
201 all; **Figure 4B**). While *Lactobacillus*-dominated CSTs I, III, and V tended to be more abundant  
202 with advancing gestational age, the abundance of the more diverse CSTs IV-A and -B declined  
203 steadily as term gestation approached (**Figure 4B**). Notably, in a secondary analysis of women ( $N$   
204 = 309) for which samples were available from each of four discrete time points across gestation,  
205 there was a pronounced shift in CST composition with advancing gestational age; specifically,  
206 there was an increase in CSTs I and III at the end of pregnancy, derived primarily from patients  
207 with an initial CST IV-A or IV-B (**Figure 4C**). These findings are in line with prior cross-sectional  
208 ([21](#), [24](#), [29](#), [36](#), [39](#), [40](#), [48](#), [88](#), [89](#), [91](#), [93](#)) and longitudinal ([22](#), [23](#), [25-28](#), [41](#), [44](#), [47](#), [48](#), [58](#), [85](#),  
209 [90](#), [92](#), [94](#), [95](#)) studies which included characterization of the structure and dynamics of the vaginal  
210 microbiota in term pregnancies. At a community level, pregnancy has been shown to create  
211 favorable conditions for a *Lactobacillus*-dominated vaginal microbiota, particularly CSTs I and  
212 III, and a shift away from the more diverse CSTs IV-A and IV-B, as gestation progresses to term

213 ([20](#), [23](#), [48](#), [58](#)). Although shifts in the vaginal microbiota occur in both gravid and non-gravid  
214 women, an increased prevalence of specifically *Lactobacillus*-dominated CSTs in pregnant  
215 women is intriguing because it could protect against ascending infection ([96](#)), which could  
216 culminate in sPTB, through the competitive exclusion of opportunistic pathogens within the  
217 vaginal microenvironment ([47](#), [97](#)). Furthermore, *Lactobacillus* species produce lactic acid, which  
218 has anti-inflammatory properties ([98-100](#)). Additional research exploring the functional role of the  
219 vaginal microbiota on the host in large longitudinal cohorts is warranted to address these  
220 hypotheses.

221         After describing the changes in the composite measures of the vaginal microbiota alpha  
222 and beta diversity and CSTs, we utilized linear mixed-effects (LME) modeling to analyze the  
223 relationships between gestational age and maternal characteristics with the relative abundances of  
224 individual bacterial taxa denoted as amplicon sequence variants, or ASVs (**Supplemental Table**  
225 **1**). Increased gestational age was positively correlated with 33 exclusively *Lactobacillus* ASVs  
226 ( $q < 0.1$ ), and negatively correlated with ASVs that are typical members of vaginal CST IV  
227 (**Supplemental Table 1, Figure 5**).

228         To supplement the LME models at the ASV level, we further implemented Analysis of  
229 Composition of Microbiomes, or ANCOM ([101](#)), to identify ASVs changing in abundance  
230 throughout gestation. Gestational age was treated as a main fixed effect, patient identity as a  
231 random effect, and maternal age, parity, *Cannabis* use, ethnicity, and race were included as  
232 covariates. Seventy-five ASVs were positively or negatively associated with gestational age  
233 (**Supplemental Table 2, Figure 6**). Fifty-six of these ASVs overlapped with those identified as  
234 being significantly associated with gestational age in the LME analysis (**Supplemental Figure 1**).  
235 As in the LME analysis, many *Lactobacillus* ASVs were positively associated with gestational age

236 while many bacteria typically associated with CST IV were negatively associated with gestational  
237 age. The direction of these associations is intriguing given prior reports that *Lactobacillus*-  
238 dominated vaginal CSTs are linked with positive reproductive outcomes (23, 26, 28) while,  
239 conversely, CST IV and CST IV-typical bacteria have been associated with an increased risk of  
240 sPTB (25, 28, 38). Notably, however, the ANCOM analyses additionally indicated that multiple  
241 ASVs classified as *Ca. Lachnocurva vaginae* also increased in abundance with advancing  
242 gestation. *Ca. Lachnocurva vaginae*, previously referred to as *Shuttleworthia* spp. (12), is an  
243 established resident bacterium of the vaginal ecosystem (102, 103), and it is typically a component  
244 of CST IV. Its increase in abundance throughout pregnancy is a novel finding, the potential clinical  
245 significance of which warrants further investigation.

246 Overall, the results were largely congruent between the linear mixed-effects models and  
247 ANCOM analyses, although there were some notable differences (e.g. *Ca. Lachnocurva vaginae*).  
248 The fundamental difference between LME and ANCOM is that ANCOM is inferring about  
249 abundances whereas LME is inferring about relative abundances. Specifically, LME evaluates  
250 whether the abundance of a particular taxon, in a unit volume of an ecosystem, relative to all other  
251 taxa, has changed between two ecosystems. On the other hand, ANCOM evaluates whether the  
252 abundance of a particular taxon, in a unit volume of an ecosystem, has changed between two  
253 ecosystems. This explains the differences in the results obtained using the two approaches.  
254 Regardless, LME and ANCOM identified ecologically plausible variation in microbiota  
255 membership across gestational age, and a large proportion of the bacterial ASVs changing in  
256 composition and abundance across pregnancy were discovered using both approaches.

257

258 *Effect of maternal parity*

259 In addition to the changes in alpha and beta diversity observed with increasing gestational age,  
260 there was also a significant effect of parity. Specifically, parity was positively correlated with alpha  
261 diversity (**Table 2**). One potential explanation for the association between parity and increased  
262 alpha diversity is that there is a marked increase in the alpha diversity of the vaginal microbiota  
263 after live birth ([85](#), [104](#)), and this phenomenon may be cumulative across multiple pregnancies,  
264 mirroring maternal-fetal immunological memory ([105-108](#)). Notably, this phenomenon cannot be  
265 explained simply by advancing maternal age, since this covariate was not positively correlated  
266 with alpha diversity of the vaginal microbiota (**Table 2**). This finding indicates that, while there is  
267 a consistent reduction in the richness and evenness of the vaginal microbiota throughout  
268 pregnancy, at least among women who have a diverse microbiota at pregnancy onset, this effect  
269 may be mitigated by parity.

270 With respect to beta diversity, only modest percentages of the variance in the composition  
271 and structure of the vaginal microbiota were explained by parity (0.3%-1.9%). Nevertheless,  
272 differences in CST membership based on parity, while adjusting for gestational age, were found  
273 (**Table 3**), with parity (OR=1.46 for each additional previous delivery) being associated with a  
274 decrease in CST III. At an ASV-level, higher maternal parity was significantly associated with an  
275 increase in 58 ASVs classified as typical vaginal CST IV bacteria (e.g., *Gardnerella*,  
276 *Megasphaera*, *Prevotella*, and *Sneathia*), while lower maternal parity was exclusively correlated  
277 with 7 *Lactobacillus* ASVs, 6 of which were classified as *L. crispatus* ( $q < 0.1$ ) (**Supplemental**  
278 **Table 1**). This finding is consistent with a recent report of increased vaginal microbiota diversity  
279 with higher parity during subsequent gestations ([109](#)). The ecological and clinical implications of  
280 the correlation between increased parity and vaginal microbiota diversity warrant further  
281 investigation.

282

### 283 *Effect of maternal age*

284 Only modest percentages of the variance in the composition and structure of the vaginal microbiota  
285 were explained by maternal age (0.2%-1.4%). Nevertheless, differences in CST membership based  
286 on maternal age, while adjusting for gestational age, were found (**Table 3**), with higher maternal  
287 age (OR=0.64 for each additional 5 years) being associated with a decrease in CST III. Similarly,  
288 at the ASV level, there were significant negative correlations between maternal age and 18 ASVs,  
289 16 of which were classified as *L. iners*, while only 4 ASVs, classified as *L. crispatus*, were  
290 positively correlated with maternal age (**Supplemental Table 1**). While these correlations contrast  
291 with a previous report ([47](#)), the differences in ethnic makeup and sample size between the two  
292 cohorts could account for this discrepancy.

293

### 294 *Effect of obesity*

295 There was a significant effect of obesity, defined as having a BMI greater than 28 kg/m<sup>2</sup>, on alpha  
296 diversity of the vaginal microbiota (**Table 2**). Specifically, there was a positive correlation between  
297 obesity and richness of the vaginal microbiota across gestation. This is in contrast with the  
298 intestinal microbiota, for which there tends to be a negative correlation between obesity and  
299 richness across gestation ([110](#)). Similar patterns are evident outside pregnancy as well. Obesity is  
300 associated with high alpha diversity of the vaginal microbiota ([111](#)) and, in general, low alpha  
301 diversity of the gut microbiota ([112-115](#)). Thus, for both of these body sites, obesity is associated  
302 with levels of microbiota alpha diversity that are widely viewed as non-optimal. As obesity is  
303 characterized by a low-grade systemic inflammatory response ([116-119](#)), these data highlight  
304 potential dynamic interactions between systemic inflammation and microbiota alpha diversity

305 throughout the human body that can influence health and disease, including pregnancy outcomes  
306 ([120](#), [121](#)).

307

### 308 *Effect of Cannabis use*

309 Only modest percentages of the variance in the composition and structure of the vaginal microbiota  
310 were explained by self-reported *Cannabis* use (0.3%-1.8%). Nevertheless, *Cannabis* use was  
311 associated with an increase in ASVs classified as *L. iners* (16 ASVs) and a decrease in those  
312 classified as *L. crispatus* (6 ASVs) (**Supplemental Table 1**). Given that *L. crispatus* has been  
313 associated with female reproductive health and positive pregnancy outcomes ([4](#), [13](#), [15](#), [16](#), [19](#),  
314 [20](#), [25](#), [27](#), [28](#), [36](#), [40](#), [44](#), [89](#), [90](#), [92](#), [97](#), [122-127](#)), these findings, among other potential general  
315 concerns ([128](#), [129](#)), caution against *Cannabis* use during pregnancy.

316

### 317 *Bacterial taxa are highly correlated with one another during normal pregnancy*

318 **Supplemental Table 3** shows some of the strongest associations (LME adjusted  $q < 0.05$  and  
319 absolute spearman correlation coefficient  $> 0.5$ ) between pairs of bacterial taxa during pregnancy.  
320 In this analysis, each genus-level taxon (or family, if genus-level designation was not available)  
321 was represented by one ASV retained based on the strongest association with gestational age. A  
322 subset of these significant correlations (involving the most relatively abundant ASVs) is shown in  
323 **Figure 7**. *Atopobium* (ASV10) and *Gardnerella* (ASV3) ( $r=0.74$ ), Eggerthellaceae (ASV39) and  
324 *Parvimonas* (ASV21) ( $r=0.83$ ), *Dialister* (ASV25) and Eggerthellaceae (ASV39) ( $r=0.83$ ), and  
325 *Sneathia* (ASV11) and *Parvimonas* (ASV 21) ( $r=0.74$ ) were among the most highly correlated  
326 pairs of bacterial taxa in pregnancy (**Supplemental Table 3**). These data suggest potential

327 synergistic relationships among these typical members of CST IV in pregnancy and potentially  
328 beyond.

329

### 330 *Network analysis reveals further changes in microbiota structure throughout pregnancy*

331 The results from LME modeling were followed up with network analyses throughout  
332 gestation. Network analyses of the 25 most relatively abundant ASVs revealed that *Lactobacillus*  
333 ASVs were consistently network hubs, defined as ASVs closest to the center of the network, across  
334 term gestation (**Figure 8A-D**). It is worth mentioning that there was limited resolution to  
335 differentiate *Lactobacillus* spp., given that the V4 hypervariable region of the 16S rRNA gene was  
336 targeted for sequencing ([130](#)). Nevertheless, *Lactobacillus* ASVs were clearly split between a  
337 primary group (ASVs 2, 7, 12, 13, 15, and 20) that included a mixture of *L. crispatus*, *L. jensenii*,  
338 and *L. gasseri*, and a secondary group (ASVs 1 and 6) comprised exclusively of *L. iners* (**Figure**  
339 **8A-D**). These positive associations were interesting, given the exclusionary nature of the CST-  
340 defining *Lactobacillus* spp. in the former group. In addition, this group maintained strong negative  
341 associations with *Gardnerella* (ASVs 3, 8, and 9), *Atopobium* (ASV 10), and *Megasphaera* (ASV  
342 4) throughout gestation. By contrast, *L. iners* ASVs had very few associations with other ASVs,  
343 either positive or negative (**Figure 8A-D**).

344 This dichotomy may be due to the species-specific ability of *Lactobacillus* to produce lactic  
345 acid (both L- and D- isomers) and - to a lesser extent - hydrogen peroxide, each of which can create  
346 hostile conditions for other bacteria ([131](#), [132](#)). While *L. iners* can produce L-lactic acid, it lacks  
347 key genes to produce D-lactic acid ([133](#)). Conversely, *Lactobacillus crispatus* produces both  
348 isomers ([127](#)). Given that these two isomers of lactic acid differentially affect the biochemistry of  
349 vaginal fluid ([127](#)), they may also differentially influence the composition of the broader



350 microbiota. Furthermore, unlike *L. crispatus*, *L. iners* lacks the ability to produce hydrogen  
351 peroxide ([20](#), [134](#)). Hydrogen peroxide is an established antimicrobial compound, yet it may only  
352 play a minor role within the vaginal ecosystem, as its production may be limited in this typically  
353 hypoxic environment ([135](#)). Regardless, the inability to produce both inhibitory metabolites may  
354 explain the lack of strong negative associations, and therefore, the permissive nature of *L. iners*,  
355 towards other ASVs when it predominates in the vagina ([20](#)).

356 We further analyzed the networks by defining clusters, formed by optimal grouping  
357 of ASVs based on strengths of association, which revealed differences in the degree of association  
358 between *Lactobacillus* spp. and CST IV-typical bacteria (**Figure 8A-D**). In particular, CST IV  
359 bacteria were split between two groups. The first, which contained *Gardnerella* (ASVs 3, 8, 9),  
360 *Atopobium* (ASV 10), and *Megasphaera*, exhibited strong negative associations with  
361 *Lactobacillus* ASVs (**Figure 8A-D**). The second, which contained *Sneathia*, *Dialister*,  
362 *Fastidiosipila*, *Shuttleworthia*, *Parvimonas*, and *Atopobium* (ASV 24), had only weak negative  
363 associations with *Lactobacillus* ASVs (**Figure 8A-D**). Interestingly, bacteria within the latter  
364 group formed increasingly positive associations amongst themselves as gestation progressed  
365 (**Figure 8A-D**). These contrasting patterns among non-*Lactobacillus* ASVs are in concordance  
366 with a prior report ([104](#)) that identified strong exclusionary associations between *L. crispatus* and  
367 *G. vaginalis* but only moderate negative associations between *L. crispatus* and other CST IV  
368 bacteria.

369 These clustering profiles mirror previously proposed splits within CST IV, with the green  
370 cluster comprised of *Gardnerella*, *Atopobium*, and *Megasphaera* representing CST IV-B and the  
371 orange cluster, formed by diverse bacteria (*Atopobium*, *Dialister*, Ca. *Lachnocurva*, *Parvimonas*,  
372 *Prevotella*, *Sneathia*) representing CST IV-C (**Figure 8A-D**). While CST IV-B is defined

373 by *Gardnerella* predominance, CST IV-C lacks a predominance of both *Lactobacillus*  
374 and *Gardnerella*. Instead, CST IV-C is formed by a multitude of diverse bacteria (11). The  
375 increase in positive associations amongst these particular CST IV-C members suggests that CST  
376 IV-C bacteria can co-exist, leading to more species-rich and diverse vaginal microbiotas than the  
377 more exclusionary CSTs. These findings are echoed in **Supplemental Table 3**, which reveals that  
378 the strongest associations among ASVs, as determined by LME modeling, exist among CST IV  
379 bacteria. For example, *Sneathia* ASV 11 and *Parvimonas* ASV 21 were highly correlated ( $r=0.74$ )  
380 and were consistently positively associated throughout gestation in the network analyses (**Figure**  
381 **8A-D**).

382 Intriguingly, *Gardnerella* ASVs 18 and 23 exhibited a distinct *Gardnerella*-correlative  
383 phenotype from the other *Gardnerella* ASVs (3, 8, and 9), which were in a separate cluster  
384 throughout most of gestation (**Figure 8 A,C-D**). Instead of exhibiting the strong *Lactobacillus*-  
385 negative associations of *Gardnerella* ASVs 3, 8, and 9, *Gardnerella* ASVs 18 and 23 were often  
386 positively correlated with other ASVs throughout gestation, including those classified as  
387 *Lactobacillus* (**Figure 8B-D**). Notably, *Gardnerella* ASV G2, which was an ASV associated with  
388 sPTB in a prior study (25), shared 100% identity with *G. vaginalis* ASV 9 and, in our study, it  
389 displayed strong negative associations with the *L. crispatus* cluster (**Figure 8A-D**). ASVs 18 and  
390 23 did not match any current *Gardnerella* type strain with 100% identity using BLAST  
391 (**Supplemental Table 4**); they may represent unique *Gardnerella* strains. This is important  
392 because *Gardnerella* is associated with bacterial vaginosis (136) and sPTB (137), yet, seemingly  
393 in a strain-dependent manner (25). Therefore, these network analyses highlight the need for strain-  
394 level resolution of the vaginal microbiota to fully understand its complex dynamics and ecology  
395 in health and disease.

396           Lastly, each of the four networks from different time points in gestation were compared  
397 with each other to identify global and ASV-specific network changes. Globally, natural  
398 connectivity (i.e., robustness of the network) significantly decreased and positive edge percentage  
399 (i.e., proportion of positive associations) significantly increased (**Figure 8E**) as pregnancy  
400 progressed, both with strong linear trends across gestation ( $R^2= 0.895$  and  $0.985$ , respectively).  
401 The increase in positive edge percentage was a combination of a decrease in negative  
402 *Lactobacillus*-CST IV-B associations, and an increase in the strength of positive associations  
403 among CST IV-C-associated ASVs. These gestational changes observed in positive edge  
404 percentage were associated with a significant decrease in closeness (i.e., the sum of the shortest  
405 paths between a node and all other nodes) for *Gardnerella* ASVs 3, 8, and 9, since many of their  
406 strong negative *Lactobacillus* spp. associations were lost or diminished as pregnancy progressed  
407 (**Figure 8B-D**). Conversely, positive associations for CST IV-associated ASVs increased in  
408 general, likely resulting from an increase in available niches within the vaginal ecosystem as term  
409 approaches. Such changes may be due to the shift towards *Lactobacillus*-dominated CSTs  
410 observed in **Figures 4B and 4C**.

411           Collectively, these network analyses demonstrate the complex interactions between  
412 members of the vaginal microbiota. Not only were we able to confirm classical associations of  
413 *Lactobacillus* species with members of other genera, but through longitudinal collection of vaginal  
414 samples, we identified shifts in network connectivity as gestation progressed. Furthermore,  
415 different ASVs attributed to the same genus (e.g., *Gardnerella*) demonstrated distinct ecological  
416 dynamics, suggesting that strain-level variation is indeed driving community phenotypes  
417 commonly denoted as CSTs. Therefore, this study highlights the need for strain-level

418 investigations utilizing metagenomic data to further characterize these shifts in vaginal microbiota  
419 ecology throughout gestation and determine their underlying causes and consequences.

420

## 421 *Conclusions and Future Directions*

422 The composition of the vaginal microbiota is broadly consistent across populations of  
423 reproductive age women worldwide ([1-5](#)), yet, the relative abundances of CSTs can vary within  
424 populations, including by ethnicity ([2-5](#)), and within individuals over time. It is increasingly  
425 hypothesized that variation in the vaginal microbiota is contributing to obstetrical complications,  
426 especially sPTB ([22](#), [23](#), [25](#), [27](#), [28](#)). Here, we have provided a longitudinal study of a primarily  
427 African-American population with a large sample size, and extensive demographic and clinical  
428 data, which allowed for the simultaneous evaluation of a broad range of maternal characteristics  
429 on the vaginal microbiota. Indeed, this study represents the largest and most comprehensive  
430 longitudinal survey of the vaginal microbiota throughout gestation resulting in a term delivery and  
431 thereby provides foundational understanding. The focus on African-American women is a clear  
432 strength of the study because they constitute a high-risk population that experiences a relatively  
433 high rate of pregnancy complications ([65-75](#)).

434 In the current study, we report that the principal factors influencing the composition and  
435 structure of the vaginal microbiota in pregnancy are individual patient identity and gestational age  
436 at sampling. The pronounced effect of individual identity highlights the need for longitudinal  
437 studies to account for inter- and intra-individual variability when evaluating the strengths of  
438 potential relationships between the composition of the vaginal microbiota and obstetrical  
439 complications. Furthermore, the richness and evenness of the vaginal microbiota decreased  
440 throughout pregnancy, with the microbiota becoming increasingly predominated by *Lactobacillus*

441 species with advancing gestation. Such typical changes can be partially mitigated by maternal  
442 parity and obesity. Importantly, *Lactobacillus* species, especially *L. crispatus*, are generally  
443 perceived to promote the vaginal and reproductive health of women ([4](#), [13](#), [15](#), [16](#), [19](#), [20](#), [25](#), [27](#),  
444 [28](#), [36](#), [40](#), [44](#), [89](#), [90](#), [92](#), [97](#), [122-127](#)); therefore, any factors that could potentially reduce the  
445 likelihood of the transition of the vaginal microbiota to a *Lactobacillus*-dominant community  
446 during pregnancy need to be identified. Lastly, network analyses revealed dynamic interactions  
447 among individual bacterial strains within the vaginal microbiota during pregnancy and the number  
448 and structure of these interactions change with advancing gestation. A critical consideration  
449 moving forward will be to assess whether patterns in these strain-level interactions within the  
450 vaginal microbiota differ between women delivering at term or those who ultimately experience  
451 sPTB. Ideally, this should be done using metagenomics ([138](#)), in addition to 16S rRNA gene  
452 sequencing, so that strain-level designation of bacterial taxa can be more readily achieved and  
453 information on the functional and virulence potential of various strains within individual  
454 microbiotas can be gleaned ([28](#), [104](#)). Furthermore, a key element missing from most studies is  
455 the characterization of host-immune microbiome interactions, which can be readily assessed by  
456 evaluating the immunoproteome (cytokines, chemokines, defensins, etc.) within the vaginal  
457 ecosystem. The local immune responses of women to their vaginal microbiota may be as or more  
458 variable than the compositions of their microbiota themselves. Therefore, elucidating the dynamics  
459 of host immune-microbiome interactions and their potential influence on obstetrical outcomes,  
460 especially sPTB, is a critical future direction ([27](#), [28](#), [139](#), [140](#)).

461

## 462 **MATERIALS AND METHODS**

### 463 *Vaginal fluid specimens*

464 Vaginal fluid samples were obtained at the Perinatology Research Branch, an intramural program  
465 of the *Eunice Kennedy Shriver* National Institute of Child Health and Human Development,  
466 National Institutes of Health, U.S. Department of Health and Human Services, Wayne State  
467 University (Detroit, MI), and the Detroit Medical Center (Detroit, MI). The collection and use of  
468 human materials for research purposes were approved by the Institutional Review Boards of the  
469 National Institute of Child Health and Human Development and Wayne State University  
470 (#110605MP2F(RCR)). All participating women provided written informed consent prior to  
471 sample collection.

472

### 473 *Study design*

474 This was a retrospective longitudinal cohort study to characterize variation in the vaginal  
475 microbiota across gestation in pregnancies ending in normal term delivery. A normal pregnancy  
476 was defined as a woman with no obstetrical, medical or surgical complications, who agreed to  
477 participate in this study, provided written signed informed consent, and delivered at term (38 to 42  
478 weeks) without complications. Three or four samples of vaginal fluid were collected longitudinally  
479 across pregnancy from each woman under direct visualization from the posterior vaginal fornix  
480 using a Dacron swab (Medical Packaging Corp., Camarillo, CA). Vaginal swabs were stored at  
481  $-80^{\circ}\text{C}$  until time of DNA extraction.

482

### 483 *DNA extraction from vaginal swabs*

484 Genomic DNA was extracted from vaginal swabs (N=1,862) alongside non-template negative  
485 controls addressing any potential background DNA contamination (N=73). All vaginal swabs were  
486 randomized across extraction runs. Extractions were conducted using a Qiagen MagAttract  
487 PowerMicrobiome DNA/RNA EP extraction kit (Qiagen, Germantown, MD), with minor  
488 modifications to the manufacturer's protocols. Briefly, swabs were transferred to clean, labeled  
489 Corning cryovials (Corning, Corning, NY) and immersed in 750  $\mu$ L solution MBL pre-heated to  
490 60°C. Swabs were then vortexed for 10 min. A provided empty PowerBead plate was then  
491 centrifuged for 1 min at 4,400 x g, and vaginal swab lysates were added to corresponding wells of  
492 the PowerBead plate. Plates containing lysates were centrifuged for 1 min at 4,400 x g. The plates  
493 were then loaded onto a TissueLyser II plate shaker (Qiagen, Germantown, MD), firmly secured,  
494 and shaken at 17 Hz for 20 min. Plates were then removed from the shaker and immediately  
495 centrifuged at 4,400 x g for 6 min. The supernatant was then carefully transferred 185  $\mu$ L at a time  
496 to a provided collection plate. Following transfer, 150  $\mu$ L of solution IRS was added to each well  
497 and plates were incubated at 4°C for 10 min. Plates were centrifuged for 15 min at 4,400 x g and  
498 supernatant was transferred to a new collection plate. The plate was centrifuged for 2 min at 4,400  
499 x g, and 850  $\mu$ L of the supernatants were transferred to a clean collection plate. The collection  
500 plate was loaded onto the epMotion 5075 liquid handler (Eppendorf, Enfield, CT, USA) for further  
501 processing following the default onboard protocols. The above procedure yielded between 0.13  
502 and 550 ng/ $\mu$ L purified DNA from the vaginal swabs as measured by a Qubit 3.0 fluorimeter and  
503 Qubit dsDNA assay kit (Life Technologies, Carlsbad, CA) following the manufacturer's protocol.  
504 The purified DNA was transferred to the provided 96-well microplates and stored at -20°C.

505

506 *16S rRNA gene amplicon sequencing and bioinformatic processing*

507 The V4 region of the 16S rRNA gene was amplified from vaginal swab DNA extracts and  
508 sequenced at Michigan State University's Research Technology Support Facility  
509 (<https://rtsf.natsci.msu.edu/>) using the dual indexing sequencing strategy developed by Kozich et  
510 al. (141). The forward primer was 515F: 5'-GTGCCAGCMGCCGCGGTAA-3' and the reverse  
511 primer was 806R: 5'-GGACTACHVGGGTWTCTAAT-3'. Each PCR reaction contained 0.5  $\mu$ M  
512 of each primer, 1.0  $\mu$ l template DNA, 7.5  $\mu$ l of 2X DreamTaq™ Hot Start PCR Master Mix (Life  
513 Technologies, Carlsbad, CA), and nuclease-free water to produce a final volume of 15  $\mu$ l.  
514 Reactions were performed using the following conditions: 95 °C for 3 minutes, followed by 30  
515 cycles of 95 °C for 45 seconds, 50 °C for 60 seconds, and 72 °C for 90 seconds, with an additional  
516 elongation at 72 °C for 10 minutes.

517

518 16S rRNA gene amplicon sequences were clustered into amplicon sequence variants (ASVs)  
519 defined by 100% sequence similarity using DADA2 version 1.12 (142) in R version 3.6.1 (143)  
520 according to the online MiSeq protocol (<https://benjjneb.github.io/dada2/tutorial.html>) with minor  
521 modifications, as previously described (144). These modifications included allowing truncation  
522 lengths of 250 and 150 bases, and a maximum number of expected errors of 2 and 7 bases, for  
523 forward and reverse reads, respectively. Reads were truncated at the first instance of a quality score  
524 less than or equal to 2. Any reads containing ambiguous nucleotides were removed from the  
525 dataset. To increase power for detecting rare variants, sample inference allowed for pooling of  
526 samples. Additionally, samples in the resulting sequence table were pooled prior to removal of  
527 chimeric sequences. Sequences were then classified using the *silva\_nr\_v132\_train\_set* database  
528 with a minimum bootstrap value of 80%, and sequences that were derived from Archaea,  
529 chloroplast, or Eukaryota were removed. Per Holm et al. (12), ASVs classified as *Shuttleworthia*



530 were manually reclassified as *Ca. Lachnocurva vaginae*.

531

532 The R package decontam version 1.6.0 ([145](#)) was used to identify ASVs that were likely potential  
533 background DNA contaminants based on their distribution among biological samples and negative  
534 controls using the “IsContaminant” method. An ASV was identified as a contaminant and  
535 subsequently removed from the dataset if it had a decontam P score  $\leq 0.5$ , was present in at least  
536 15% of negative controls with an overall average relative abundance of at least 1.0%, and had a  
537 greater average relative abundance in controls than biological samples. Based on these criteria, a  
538 total of four ASVs classified as *Escherichia*, *Pelomonas*, *Pseudomonas*, and Micrococcaceae were  
539 identified as contaminants.

540

541 For assigning community state types (CSTs) to the bacterial community profiles, ASVs were first  
542 taxonomically classified using the V4\_trimmed\_noEuks\_nr\_Complete.fa reference library  
543 supplied with the speciateIT classifier code (<http://ravel-lab.org/speciateit/>) and the classify.seqs  
544 command in mothur ([146](#)) with a bootstrap cutoff value of 80. Read counts for ASVs that were  
545 assigned to the same taxon were then combined, and CSTs were assigned using VALENCIA, a  
546 nearest centroid-based classifier ([11](#)).

547

## 548 ***Statistical analysis***

### 549 *Analysis of vaginal microbiota composition and structure*

550 To determine the percentage of variance explained ( $R^2$ ) in the composition (Jaccard index) or  
551 structure (Bray-Curtis index) of the vaginal microbiota, PERMANOVA analyses ([147](#)) were  
552 performed using the interaction terms between SubjectID and gestational age at sampling within

553 the “adonis2” function in the R package *vegan* version 2.5-6 ([148](#)). The confidence intervals of  $R^2$   
554 statistics were obtained by bootstrap sampling of patients and all their associated longitudinal  
555 measurements. Confidence intervals for  $R^2$  statistics for additional patient specific covariates (i.e.,  
556 maternal age, parity, obesity, race, ethnicity, *cannabis* use) while accounting for gestational age  
557 were obtained in a separate analysis in which PERMANOVA analysis was performed on bootstrap  
558 samples of subjects. For each subject only one random longitudinal observation was selected,  
559 hence generating cross-sectional datasets in which observations were independent and hence  
560 PERMANOVA could be applied. Empirical 95% confidence intervals of  $R^2$  statistics were  
561 obtained using 1000 bootstrap iterations.

562

### 563 *Changes in alpha diversity with gestational age and maternal characteristics*

564 Relative abundance for each amplicon sequence variant (ASV) was determined as the ratio of the  
565 count of each ASV divided by the total number of ASVs in each sample. Starting with the relative  
566 abundance data, for each sample, we calculated the Shannon and Simpson diversity using the  
567 *diversity* function in the *vegan* package and the Chao1 diversity using the *chao1* function in the  
568 *fossil* package. Each measure of diversity was then correlated with the continuous variable  
569 gestational age at sampling using linear mixed-effects models implemented in the *lme4* package  
570 in R. In these models a random intercept and a random slope with gestational age was allowed for  
571 each subject to account for the repeated and potentially correlated observations from the same  
572 subject. Gestational age values were centered at 8 weeks and then scaled by 4 to facilitate  
573 interpretation of random intercepts and convergence of model fitting algorithms. The complexity  
574 of the gestational age dependence was assessed by comparing the model fit between a linear and  
575 quadratic trend using a likelihood ratio test for linear mixed-effects models. The same test was

576 used to determine the need for subject specific gestational age slopes. To further inspect nonlinear  
577 trends in alpha diversity as a function of gestational age, Generalized Additive Models (GAM) for  
578 repeated observations were also fit based on spline transformation of gestational age. Such models  
579 were available from the *mgcv* package in R. The effects of maternal characteristics (maternal age,  
580 obesity, parity, race, ethnicity, smoking, and *cannabis* use) were assessed by including these as  
581 co-variates in linear mixed-effects models. A p-value <0.05 was used to infer significance in these  
582 analyses.

583

584 *Changes in vaginal community state types (CSTs) with gestational age and maternal*  
585 *characteristics*

586 The log-odds of membership in a given community state type (CST) were modeled using binomial  
587 linear mixed-effects models using the *glmer* function in R. Fixed effects in these models included  
588 gestational age at sampling (linear and quadratic terms, as needed) and maternal characteristics.  
589 Of note, due to the sparse responses in these models (membership to a given CST), it was not  
590 feasible to test whether there were subject-specific departures in the CST membership probability  
591 trends versus gestational age (random slopes for gestational age), yet subject specific shifts in  
592 membership probabilities were allowed via random intercepts in the mixed effects models.

593

594 *Changes in the relative abundance of individual amplicon sequence variants (ASVs) with*  
595 *gestational age and maternal characteristics*

596 The analysis of the relative abundance of each amplicon sequence variant (ASV) in association  
597 with gestational age at sampling was performed using linear mixed-effects models based on ASV  
598 count data while assuming a negative binomial distribution of the counts. Such models were

599 implemented in the *glmmTMB* package in R and included an offset term of the total number of  
600 reads per sample, so that changes in relative abundance with gestational age were being estimated  
601 as opposed to differences in absolute counts. These models included gestational age and maternal  
602 characteristics as fixed effects and random intercept and random gestational age slope for each  
603 subject. All analyses involved control of the false discovery rate at a 10% level ( $q < 0.1$ ).

604 Additionally, we implemented Analysis of Composition of Microbiomes, or ANCOM  
605 ([101](#)), for further differential abundance analysis of ASVs. After adding a pseudo-count (1) to all  
606 observed abundances, ANCOM accounts for the compositionality issue of the microbiome data by  
607 performing the additive log ratio (ALR) transformation. For each taxon, ANCOM uses all other  
608 taxa, one at a time, as the reference in forming the ALR transformation. The transformed data were  
609 treated as the response of the LME model which includes gestational age as the main fixed effect,  
610 maternal age, parity, marijuana use, ethnicity, and race as covariates while allowing a random  
611 intercept and a random slope for each subject. For a given taxon, the output W statistic represents  
612 the number of ALR transformed models where the taxon is differentially abundant with regard to  
613 the main fixed effect, after adjusting for multiple testing correction for the number of ALR models  
614 corresponding to each taxon. The larger the value of W, the more likely the taxon is differentially  
615 abundant between compared sample groups.

616

#### 617 *Bacterial taxa with the most highly associated relative abundances during normal pregnancy*

618 To assess the association between pairs of ASVs, we modeled their log-transformed relative  
619 abundance data using linear mixed-effects models. In these models one of the two ASVs was  
620 treated as a response variable while the other was treated as an explanatory variable. A random  
621 effect was allowed for each subject. Naïve Spearman correlation coefficients were also calculated

622 for each pair. Significance of correlations was based on an adjusted p-value  $<0.05$ .

623

624 *Associations of ASVs across term pregnancy through network analysis*

625 The R packages NetCoMi ([149](#))1.0.2, SpiecEasi 1.1.2, and seqtime 0.1.1 were used in R version  
626 4.0.3 to create correlation networks between ASVs from vaginal samples across four time points  
627 in gestation resulting in term delivery. Only one sample per subject was included for each time  
628 point to control for subject ID. Networks were generated using Spearman's correlation since the  
629 data were not normally distributed and nonparametric. Only the top 25 predominant ASVs in the  
630 entire dataset were considered for each network. A topological overlap matrix generated from the  
631 network adjacency matrix was utilized as a dissimilarity measure after transforming the data  
632 through multiplicative simple replacement and a centered log-ratio transformation to account for  
633 the zero-inflated data and to normalize the data, respectively. Community structure was  
634 determined by implementing the fast greedy modularity optimization algorithm ([150](#)). The layout  
635 of the network for the first time period was used as the layout for all subsequent time periods.  
636 Edges displayed in the network exceeded a threshold of 0.3 and edge thickness was tied to the  
637 strength of the correlation between two given nodes. Networks of the four time periods were  
638 compared using the NetCoMi package "netCompare" function with 1000 permutations.

639

640

641 **ACKNOWLEDGEMENTS**

642 We thank the physicians and nurses from the Center for Advanced Obstetrical Care and Research  
643 and the Intrapartum Unit for their help in collecting human samples. The authors also thank the  
644 staff members of the PRB Clinical Laboratory for the processing of these samples. This research  
645 was supported, in part, by the Perinatology Research Branch, Division of Obstetrics and Maternal-  
646 Fetal Medicine, Division of Intramural Research, *Eunice Kennedy Shriver* National Institute of  
647 Child Health and Human Development, National Institutes of Health, U.S. Department of Health  
648 and Human Services (NICHD/NIH/DHHS) under Contract No. HHSN275201300006C. KRT,  
649 AT, and NG-L were further supported by the Wayne State University Perinatal Research Initiative  
650 in Maternal, Perinatal and Child Health. Dr. Romero has contributed to this work as part of his  
651 official duties as an employee of the United States Federal Government.

652

653 **CONFLICT OF INTEREST STATEMENT**

654 The authors declare no conflicts of interest.

655 **REFERENCES**

- 656 1. Zhou X, Bent SJ, Schneider MG, Davis CC, Islam MR, Forney LJ. 2004. Characterization of  
657 vaginal microbial communities in adult healthy women using cultivation-independent  
658 methods. *Microbiology (Reading)* 150:2565-2573.
- 659 2. Zhou X, Brown CJ, Abdo Z, Davis CC, Hansmann MA, Joyce P, Foster JA, Forney LJ. 2007.  
660 Differences in the composition of vaginal microbial communities found in healthy  
661 Caucasian and black women. *ISME J* 1:121-33.
- 662 3. Zhou X, Hansmann MA, Davis CC, Suzuki H, Brown CJ, Schutte U, Pierson JD, Forney LJ.  
663 2010. The vaginal bacterial communities of Japanese women resemble those of women  
664 in other racial groups. *FEMS Immunol Med Microbiol* 58:169-81.
- 665 4. Ravel J, Gajer P, Abdo Z, Schneider GM, Koenig SS, McCulle SL, Karlebach S, Gorle R,  
666 Russell J, Tacket CO, Brotman RM, Davis CC, Ault K, Peralta L, Forney LJ. 2011. Vaginal  
667 microbiome of reproductive-age women. *Proc Natl Acad Sci U S A* 108 Suppl 1:4680-7.
- 668 5. Gajer P, Brotman RM, Bai G, Sakamoto J, Schutte UM, Zhong X, Koenig SS, Fu L, Ma ZS,  
669 Zhou X, Abdo Z, Forney LJ, Ravel J. 2012. Temporal dynamics of the human vaginal  
670 microbiota. *Sci Transl Med* 4:132ra52.
- 671 6. Pybus V, Onderdonk AB. 1999. Microbial interactions in the vaginal ecosystem, with  
672 emphasis on the pathogenesis of bacterial vaginosis. *Microbes Infect* 1:285-92.
- 673 7. Fredricks DN, Fiedler TL, Marrazzo JM. 2005. Molecular identification of bacteria  
674 associated with bacterial vaginosis. *N Engl J Med* 353:1899-911.
- 675 8. Brooks JP, Buck GA, Chen G, Diao L, Edwards DJ, Fettweis JM, Huzurbazar S, Rakitin A,  
676 Satten GA, Smirnova E, Waks Z, Wright ML, Yanover C, Zhou YH. 2017. Changes in  
677 vaginal community state types reflect major shifts in the microbiome. *Microb Ecol*  
678 *Health Dis* 28:1303265.
- 679 9. Verstraelen H, Vieira-Baptista P, De Seta F, Ventolini G, Lonnee-Hoffmann R, Lev-Sagie  
680 A. 2022. The Vaginal Microbiome: I. Research Development, Lexicon, Defining "Normal"  
681 and the Dynamics Throughout Women's Lives. *J Low Genit Tract Dis* 26:73-78.
- 682 10. Fredricks DN, Marrazzo JM. 2005. Molecular methodology in determining vaginal flora in  
683 health and disease: its time has come. *Curr Infect Dis Rep* 7:463-70.
- 684 11. France MT, Ma B, Gajer P, Brown S, Humphrys MS, Holm JB, Waetjen LE, Brotman RM,  
685 Ravel J. 2020. VALENCIA: a nearest centroid classification method for vaginal microbial  
686 communities based on composition. *Microbiome* 8:166.
- 687 12. Holm JB, France MT, Ma B, McComb E, Robinson CK, Mehta A, Tallon LJ, Brotman RM,  
688 Ravel J. 2020. Comparative Metagenome-Assembled Genome Analysis of "Candidatus  
689 *Lachnocurva vaginae*", Formerly Known as Bacterial Vaginosis-Associated Bacterium-1  
690 (BVAB1). *Front Cell Infect Microbiol* 10:117.
- 691 13. Tamrakar R, Yamada T, Furuta I, Cho K, Morikawa M, Yamada H, Sakuragi N, Minakami  
692 H. 2007. Association between *Lactobacillus* species and bacterial vaginosis-related  
693 bacteria, and bacterial vaginosis scores in pregnant Japanese women. *BMC Infect Dis*  
694 7:128.
- 695 14. Linhares IM, Summers PR, Larsen B, Giraldo PC, Witkin SS. 2011. Contemporary  
696 perspectives on vaginal pH and lactobacilli. *Am J Obstet Gynecol* 204:120 e1-5.

- 697 15. Stapleton AE, Au-Yeung M, Hooton TM, Fredricks DN, Roberts PL, Czaja CA, Yarova-  
698 Yarovaya Y, Fiedler T, Cox M, Stamm WE. 2011. Randomized, placebo-controlled phase 2  
699 trial of a *Lactobacillus crispatus* probiotic given intravaginally for prevention of recurrent  
700 urinary tract infection. *Clin Infect Dis* 52:1212-7.
- 701 16. Petrova MI, Lievens E, Malik S, Imholz N, Lebeer S. 2015. *Lactobacillus* species as  
702 biomarkers and agents that can promote various aspects of vaginal health. *Front Physiol*  
703 6:81.
- 704 17. Matsuda Y, Cho O, Sugita T, Ogishima D, Takeda S. 2018. Culture Supernatants of  
705 *Lactobacillus gasseri* and *L. crispatus* Inhibit *Candida albicans* Biofilm Formation and  
706 Adhesion to HeLa Cells. *Mycopathologia* 183:691-700.
- 707 18. Phukan N, Brooks AES, Simoes-Barbosa A. 2018. A Cell Surface Aggregation-Promoting  
708 Factor from *Lactobacillus gasseri* Contributes to Inhibition of *Trichomonas vaginalis*  
709 Adhesion to Human Vaginal Ectocervical Cells. *Infect Immun* 86.
- 710 19. Ceccarani C, Foschi C, Parolin C, D'Antuono A, Gaspari V, Consolandi C, Laghi L, Camboni  
711 T, Vitali B, Severgnini M, Marangoni A. 2019. Diversity of vaginal microbiome and  
712 metabolome during genital infections. *Sci Rep* 9:14095.
- 713 20. Verstraelen H, Verhelst R, Claeys G, De Backer E, Temmerman M, Vanechoutte M.  
714 2009. Longitudinal analysis of the vaginal microflora in pregnancy suggests that *L.*  
715 *crispatus* promotes the stability of the normal vaginal microflora and that *L. gasseri*  
716 and/or *L. iners* are more conducive to the occurrence of abnormal vaginal microflora.  
717 *BMC Microbiol* 9:116.
- 718 21. Aagaard K, Riehle K, Ma J, Segata N, Mistretta TA, Coarfa C, Raza S, Rosenbaum S, Van  
719 den Veyver I, Milosavljevic A, Gevers D, Huttenhower C, Petrosino J, Versalovic J. 2012.  
720 A metagenomic approach to characterization of the vaginal microbiome signature in  
721 pregnancy. *PLoS One* 7:e36466.
- 722 22. Hyman RW, Fukushima M, Jiang H, Fung E, Rand L, Johnson B, Vo KC, Caughey AB, Hilton  
723 JF, Davis RW, Giudice LC. 2014. Diversity of the vaginal microbiome correlates with  
724 preterm birth. *Reprod Sci* 21:32-40.
- 725 23. DiGiulio DB, Callahan BJ, McMurdie PJ, Costello EK, Lyell DJ, Robaczewska A, Sun CL,  
726 Goltsman DS, Wong RJ, Shaw G, Stevenson DK, Holmes SP, Relman DA. 2015. Temporal  
727 and spatial variation of the human microbiota during pregnancy. *Proc Natl Acad Sci U S*  
728 *A* 112:11060-5.
- 729 24. Nelson DB, Shin H, Wu J, Dominguez-Bello MG. 2016. The Gestational Vaginal  
730 Microbiome and Spontaneous Preterm Birth among Nulliparous African American  
731 Women. *Am J Perinatol* 33:887-93.
- 732 25. Callahan BJ, DiGiulio DB, Goltsman DSA, Sun CL, Costello EK, Jeganathan P, Biggio JR,  
733 Wong RJ, Druzin ML, Shaw GM, Stevenson DK, Holmes SP, Relman DA. 2017. Replication  
734 and refinement of a vaginal microbial signature of preterm birth in two racially distinct  
735 cohorts of US women. *Proc Natl Acad Sci U S A* 114:9966-9971.
- 736 26. Brown RG, Marchesi JR, Lee YS, Smith A, Lehne B, Kindinger LM, Terzidou V, Holmes E,  
737 Nicholson JK, Bennett PR, MacIntyre DA. 2018. Vaginal dysbiosis increases risk of  
738 preterm fetal membrane rupture, neonatal sepsis and is exacerbated by erythromycin.  
739 *BMC Med* 16:9.



- 740 27. Elovitz MA, Gajer P, Riis V, Brown AG, Humphrys MS, Holm JB, Ravel J. 2019.  
741 Cervicovaginal microbiota and local immune response modulate the risk of spontaneous  
742 preterm delivery. *Nature Communications* 10:1305.
- 743 28. Fettweis JM, Serrano MG, Brooks JP, Edwards DJ, Girerd PH, Parikh HI, Huang B, Arodz  
744 TJ, Edupuganti L, Glascock AL, Xu J, Jimenez NR, Vivadelli SC, Fong SS, Sheth NU, Jean S,  
745 Lee V, Bokhari YA, Lara AM, Mistry SD, Duckworth RA, 3rd, Bradley SP, Koparde VN,  
746 Orenda XV, Milton SH, Rozycki SK, Matveyev AV, Wright ML, Huzurbazar SV, Jackson EM,  
747 Smirnova E, Korlach J, Tsai YC, Dickinson MR, Brooks JL, Drake JI, Chaffin DO, Sexton AL,  
748 Gravett MG, Rubens CE, Wijesooriya NR, Hendricks-Munoz KD, Jefferson KK, Strauss JF,  
749 3rd, Buck GA. 2019. The vaginal microbiome and preterm birth. *Nat Med* 25:1012-1021.
- 750 29. de Freitas AS, Dobbler PCT, Mai V, Procianoy RS, Silveira RC, Corso AL, Roesch LFW.  
751 2020. Defining microbial biomarkers for risk of preterm labor. *Brazilian Journal of*  
752 *Microbiology* 51:151-159.
- 753 30. Pybus V, Onderdonk AB. 1997. Evidence for a commensal, symbiotic relationship  
754 between *Gardnerella vaginalis* and *Prevotella bivia* involving ammonia: potential  
755 significance for bacterial vaginosis. *J Infect Dis* 175:406-13.
- 756 31. Pybus V, Onderdonk AB. 1998. A commensal symbiosis between *Prevotella bivia* and  
757 *Peptostreptococcus anaerobius* involves amino acids: potential significance to the  
758 pathogenesis of bacterial vaginosis. *FEMS Immunol Med Microbiol* 22:317-27.
- 759 32. Bradshaw CS, Tabrizi SN, Fairley CK, Morton AN, Rudland E, Garland SM. 2006. The  
760 association of *Atopobium vaginae* and *Gardnerella vaginalis* with bacterial vaginosis and  
761 recurrence after oral metronidazole therapy. *J Infect Dis* 194:828-36.
- 762 33. Fredricks DN, Fiedler TL, Thomas KK, Oakley BB, Marrazzo JM. 2007. Targeted PCR for  
763 detection of vaginal bacteria associated with bacterial vaginosis. *J Clin Microbiol*  
764 45:3270-6.
- 765 34. Menard JP, Fenollar F, Henry M, Bretelle F, Raoult D. 2008. Molecular quantification of  
766 *Gardnerella vaginalis* and *Atopobium vaginae* loads to predict bacterial vaginosis. *Clin*  
767 *Infect Dis* 47:33-43.
- 768 35. Ling Z, Kong J, Liu F, Zhu H, Chen X, Wang Y, Li L, Nelson KE, Xia Y, Xiang C. 2010.  
769 Molecular analysis of the diversity of vaginal microbiota associated with bacterial  
770 vaginosis. *BMC Genomics* 11:488.
- 771 36. Tabatabaei N, Eren A, Barreiro L, Yotova V, Dumaine A, Allard C, Fraser W. 2019. Vaginal  
772 microbiome in early pregnancy and subsequent risk of spontaneous preterm birth: a  
773 case-control study. *BJOG: An International Journal of Obstetrics & Gynaecology*  
774 126:349-358.
- 775 37. Chang DH, Shin J, Rhee MS, Park KR, Cho BK, Lee SK, Kim BC. 2020. Vaginal Microbiota  
776 Profiles of Native Korean Women and Associations with High-Risk Pregnancy. *J Microbiol*  
777 *Biotechnol* 30:248-258.
- 778 38. Dunlop AL, Satten GA, Hu YJ, Knight AK, Hill CC, Wright ML, Smith AK, Read TD, Pearce  
779 BD, Corwin EJ. 2021. Vaginal Microbiome Composition in Early Pregnancy and Risk of  
780 Spontaneous Preterm and Early Term Birth Among African American Women. *Front Cell*  
781 *Infect Microbiol* 11:641005.

- 782 39. Hočevar K, Maver A, Vidmar Šimic M, Hodžić A, Haslberger A, Premru Seršen T, Peterlin  
783 B. 2019. Vaginal Microbiome Signature Is Associated With Spontaneous Preterm  
784 Delivery. *Front Med (Lausanne)* 6:201.
- 785 40. Kumar M, Murugesan S, Singh P, Saadaoui M, Elhag DA, Terranegra A, Kabeer BSA, Marr  
786 AK, Kino T, Brummaier T, McGready R, Nosten F, Chaussabel D, Al Khodor S. 2021.  
787 Vaginal Microbiota and Cytokine Levels Predict Preterm Delivery in Asian Women. *Front*  
788 *Cell Infect Microbiol* 11:639665.
- 789 41. Odogwu NM, Onebunne CA, Chen J, Ayeni FA, Walther-Antonio MRS, Olayemi OO, Chia  
790 N, Omigbodun AO. 2021. *Lactobacillus crispatus* thrives in pregnancy hormonal milieu in  
791 a Nigerian patient cohort. *Scientific Reports* 11:18152.
- 792 42. Blencowe H, Lee AC, Cousens S, Bahalim A, Narwal R, Zhong N, Chou D, Say L, Modi N,  
793 Katz J, Vos T, Marlow N, Lawn JE. 2013. Preterm birth-associated neurodevelopmental  
794 impairment estimates at regional and global levels for 2010. *Pediatr Res* 74 Suppl 1:17-  
795 34.
- 796 43. Chawanpaiboon S, Vogel JP, Moller AB, Lumbiganon P, Petzold M, Hogan D, Landoulsi S,  
797 Jampathong N, Kongwattanakul K, Laopaiboon M, Lewis C, Rattanakanokchai S, Teng  
798 DN, Thinkhamrop J, Watananirun K, Zhang J, Zhou W, Gülmezoglu AM. 2019. Global,  
799 regional, and national estimates of levels of preterm birth in 2014: a systematic review  
800 and modelling analysis. *Lancet Glob Health* 7:e37-e46.
- 801 44. Romero R, Hassan SS, Gajer P, Tarca AL, Fadrosh DW, Bieda J, Chaemsaitong P,  
802 Miranda J, Chaiworapongsa T, Ravel J. 2014. The vaginal microbiota of pregnant women  
803 who subsequently have spontaneous preterm labor and delivery and those with a  
804 normal delivery at term. *Microbiome* 2:18.
- 805 45. Peelen MJ, Luef BM, Lamont RF, de Milliano I, Jensen JS, Limpens J, Hajenius PJ,  
806 Jorgensen JS, Menon R, Group PBW. 2019. The influence of the vaginal microbiota on  
807 preterm birth: A systematic review and recommendations for a minimum dataset for  
808 future research. *Placenta* 79:30-39.
- 809 46. Fettweis JM, Brooks JP, Serrano MG, Sheth NU, Girerd PH, Edwards DJ, Strauss JF, The  
810 Vaginal Microbiome C, Jefferson KK, Buck GA. 2014. Differences in vaginal microbiome  
811 in African American women versus women of European ancestry. *Microbiology*  
812 (Reading) 160:2272-2282.
- 813 47. Walther-Antonio MRS, Jeraldo P, Miller MEB, Yeoman CJ, Nelson KE, Wilson BA, White  
814 BA, Chia N, Creedon DJ. 2014. Pregnancy's Stronghold on the Vaginal Microbiome. *Plos*  
815 *One* 9:10.
- 816 48. Serrano MG, Parikh HI, Brooks JP, Edwards DJ, Arodz TJ, Edupuganti L, Huang B, Girerd  
817 PH, Bokhari YA, Bradley SP, Brooks JL, Dickinson MR, Drake JI, Duckworth RA, 3rd, Fong  
818 SS, Glascock AL, Jean S, Jimenez NR, Khoury J, Koparde VN, Lara AM, Lee V, Matveyev  
819 AV, Milton SH, Mistry SD, Rozycki SK, Sheth NU, Smirnova E, Vivadelli SC, Wijesooriya  
820 NR, Xu J, Xu P, Chaffin DO, Sexton AL, Gravett MG, Rubens CE, Hendricks-Munoz KD,  
821 Jefferson KK, Strauss JF, 3rd, Fettweis JM, Buck GA. 2019. Racioethnic diversity in the  
822 dynamics of the vaginal microbiome during pregnancy. *Nat Med* 25:1001-1011.
- 823 49. Johnson SR, Petzold CR, Galask RP. 1985. Qualitative and quantitative changes of the  
824 vaginal microbial flora during the menstrual cycle. *Am J Reprod Immunol Microbiol* 9:1-  
825 5.

- 826 50. Eschenbach DA, Thwin SS, Patton DL, Hooton TM, Stapleton AE, Agnew K, Winter C,  
827 Meier A, Stamm WE. 2000. Influence of the normal menstrual cycle on vaginal tissue,  
828 discharge, and microflora. *Clin Infect Dis* 30:901-7.
- 829 51. Shiraishi T, Fukuda K, Morotomi N, Imamura Y, Mishima J, Imai S, Miyazawa K, Taniguchi  
830 H. 2011. Influence of menstruation on the microbiota of healthy women's labia minora  
831 as analyzed using a 16S rRNA gene-based clone library method. *Jpn J Infect Dis* 64:76-80.
- 832 52. Witkin SS, Ledger WJ. 2012. Complexities of the uniquely human vagina. *Sci Transl Med*  
833 4:132fs11.
- 834 53. Brotman RM, Ravel J, Bavoil PM, Gravitt PE, Ghanem KG. 2014. Microbiome, sex  
835 hormones, and immune responses in the reproductive tract: challenges for vaccine  
836 development against sexually transmitted infections. *Vaccine* 32:1543-52.
- 837 54. Mirmonsef P, Hotton AL, Gilbert D, Burgad D, Landay A, Weber KM, Cohen M, Ravel J,  
838 Spear GT. 2014. Free glycogen in vaginal fluids is associated with *Lactobacillus*  
839 colonization and low vaginal pH. *PLoS One* 9:e102467.
- 840 55. Mitchell CM, Fredricks DN, Winer RL, Koutsky L. 2012. Effect of sexual debut on vaginal  
841 microbiota in a cohort of young women. *Obstet Gynecol* 120:1306-13.
- 842 56. Jespers V, van de Wijgert J, Cools P, Verhelst R, Verstraelen H, Delany-Moretlwe S,  
843 Mwaura M, Ndayisaba GF, Mandaliya K, Menten J, Hardy L, Crucitti T, Vaginal  
844 Biomarkers Study G. 2015. The significance of *Lactobacillus crispatus* and *L. vaginalis* for  
845 vaginal health and the negative effect of recent sex: a cross-sectional descriptive study  
846 across groups of African women. *BMC Infect Dis* 15:115.
- 847 57. Mehta SD, Zulaika G, Otieno FO, Nyothach E, Agingu W, Bhaumik R, Green SJ, van Eijk  
848 AM, Kwaro D, Phillips-Howard PA. 2021. High Prevalence of *Lactobacillus crispatus*  
849 Dominated Vaginal Microbiome Among Kenyan Secondary School Girls: Negative Effects  
850 of Poor Quality Menstrual Hygiene Management and Sexual Activity. *Front Cell Infect*  
851 *Microbiol* 11:716537.
- 852 58. Romero R, Hassan SS, Gajer P, Tarca AL, Fadrosch DW, Nikita L, Galuppi M, Lamont RF,  
853 Chaemsathong P, Miranda J, Chaiworapongsa T, Ravel J. 2014. The composition and  
854 stability of the vaginal microbiota of normal pregnant women is different from that of  
855 non-pregnant women. *Microbiome* 2.
- 856 59. Tal R, Taylor HS. 2000. *Endocrinology of Pregnancy*. In Feingold KR, Anawalt B, Boyce A,  
857 Chrousos G, de Herder WW, Dhatariya K, Dungan K, Hershman JM, Hofland J, Kalra S,  
858 Kaltsas G, Koch C, Kopp P, Korbonits M, Kovacs CS, Kuohung W, Laferrère B, Levy M,  
859 McGee EA, McLachlan R, Morley JE, New M, Purnell J, Sahay R, Singer F, Sperling MA,  
860 Stratakis CA, Trencle DL, Wilson DP (ed), *Endotext*. MDText.com, Inc.
- 861 Copyright © 2000-2022, MDText.com, Inc., South Dartmouth (MA).
- 862 60. Schock H, Zeleniuch-Jacquotte A, Lundin E, Grankvist K, Lakso HA, Idahl A, Lehtinen M,  
863 Surcel HM, Fortner RT. 2016. Hormone concentrations throughout uncomplicated  
864 pregnancies: a longitudinal study. *BMC Pregnancy Childbirth* 16:146.
- 865 61. Petricevic L, Domig KJ, Nierscher FJ, Sandhofer MJ, Fidesser M, Krondorfer I, Husslein P,  
866 Kneifel W, Kiss H. 2014. Characterisation of the vaginal *Lactobacillus* microbiota  
867 associated with preterm delivery. *Sci Rep* 4:5136.
- 868 62. Prince AL, Antony KM, Chu DM, Aagaard KM. 2014. The microbiome, parturition, and  
869 timing of birth: more questions than answers. *J Reprod Immunol* 104-105:12-9.

- 870 63. Witkin SS. 2015. The vaginal microbiome, vaginal anti-microbial defence mechanisms  
871 and the clinical challenge of reducing infection-related preterm birth. *Bjog* 122:213-8.
- 872 64. Bayar E, Bennett PR, Chan D, Sykes L, MacIntyre DA. 2020. The pregnancy microbiome  
873 and preterm birth. *Semin Immunopathol* 42:487-499.
- 874 65. Saftlas AF, Koonin LM, Atrash HK. 2000. Racial disparity in pregnancy-related mortality  
875 associated with livebirth: can established risk factors explain it? *Am J Epidemiol*  
876 152:413-9.
- 877 66. Willinger M, Ko CW, Reddy UM. 2009. Racial disparities in stillbirth risk across gestation  
878 in the United States. *Am J Obstet Gynecol* 201:469.e1-8.
- 879 67. Callaghan WM. 2012. Overview of maternal mortality in the United States. *Semin*  
880 *Perinatol* 36:2-6.
- 881 68. Creanga AA, Bateman BT, Kuklina EV, Callaghan WM. 2014. Racial and ethnic disparities  
882 in severe maternal morbidity: a multistate analysis, 2008-2010. *Am J Obstet Gynecol*  
883 210:435.e1-8.
- 884 69. Howell EA, Egorova N, Balbierz A, Zeitlin J, Hebert PL. 2016. Black-white differences in  
885 severe maternal morbidity and site of care. *Am J Obstet Gynecol* 214:122.e1-7.
- 886 70. Gyamfi-Bannerman C, Srinivas SK, Wright JD, Goffman D, Siddiq Z, D'Alton ME, Friedman  
887 AM. 2018. Postpartum hemorrhage outcomes and race. *Am J Obstet Gynecol*  
888 219:185.e1-185.e10.
- 889 71. Salow AD, Pool LR, Grobman WA, Kershaw KN. 2018. Associations of neighborhood-level  
890 racial residential segregation with adverse pregnancy outcomes. *Am J Obstet Gynecol*  
891 218:351.e1-351.e7.
- 892 72. Moaddab A, Dildy GA, Brown HL, Bateni ZH, Belfort MA, Sangi-Haghpeykar H, Clark SL.  
893 2018. Health Care Disparity and Pregnancy-Related Mortality in the United States, 2005-  
894 2014. *Obstet Gynecol* 131:707-712.
- 895 73. Bogardus MH, Wen T, Gyamfi-Bannerman C, Wright JD, Goffman D, Sheen JJ, D'Alton  
896 ME, Friedman AM. 2021. Racial and Ethnic Disparities in Peripartum Hysterectomy Risk  
897 and Outcomes. *Am J Perinatol* 38:999-1009.
- 898 74. Burris HH, Passarella M, Handley SC, Srinivas SK, Lorch SA. 2021. Black-White disparities  
899 in maternal in-hospital mortality according to teaching and Black-serving hospital status.  
900 *Am J Obstet Gynecol* 225:83.e1-83.e9.
- 901 75. Hamilton JL, Shumbusho D, Cooper D, Fletcher T, Aden J, Weir L, Keyser E. 2021. Race  
902 matters: maternal morbidity in the Military Health System. *Am J Obstet Gynecol*  
903 224:512.e1-512.e6.
- 904 76. Fierer N, Hamady M, Lauber CL, Knight R. 2008. The influence of sex, handedness, and  
905 washing on the diversity of hand surface bacteria. *Proc Natl Acad Sci U S A* 105:17994-9.
- 906 77. Turnbaugh PJ, Hamady M, Yatsunencko T, Cantarel BL, Duncan A, Ley RE, Sogin ML, Jones  
907 WJ, Roe BA, Affourtit JP, Egholm M, Henrissat B, Heath AC, Knight R, Gordon JI. 2009. A  
908 core gut microbiome in obese and lean twins. *Nature* 457:480-4.
- 909 78. Consortium HMP. 2012. Structure, function and diversity of the healthy human  
910 microbiome. *Nature* 486:207-14.
- 911 79. Ursell LK, Metcalf JL, Parfrey LW, Knight R. 2012. Defining the human microbiome. *Nutr*  
912 *Rev* 70 Suppl 1:S38-44.

- 913 80. Li K, Bihan M, Methé BA. 2013. Analyses of the stability and core taxonomic  
914 memberships of the human microbiome. *PLoS One* 8:e63139.
- 915 81. Gilbert JA, Blaser MJ, Caporaso JG, Jansson JK, Lynch SV, Knight R. 2018. Current  
916 understanding of the human microbiome. *Nat Med* 24:392-400.
- 917 82. Gonzalez A, King A, Robeson MS, 2nd, Song S, Shade A, Metcalf JL, Knight R. 2012.  
918 Characterizing microbial communities through space and time. *Curr Opin Biotechnol*  
919 23:431-6.
- 920 83. Gerber GK. 2014. The dynamic microbiome. *FEBS Lett* 588:4131-9.
- 921 84. Faust K, Lahti L, Gonze D, de Vos WM, Raes J. 2015. Metagenomics meets time series  
922 analysis: unraveling microbial community dynamics. *Curr Opin Microbiol* 25:56-66.
- 923 85. MacIntyre DA, Chandiramani M, Lee YS, Kindinger L, Smith A, Angelopoulos N, Lehne B,  
924 Arulkumaran S, Brown R, Teoh TG, Holmes E, Nicholson JK, Marchesi JR, Bennett PR.  
925 2015. The vaginal microbiome during pregnancy and the postpartum period in a  
926 European population. *Sci Rep* 5:8988.
- 927 86. Cruickshank R, Sharman A. 1934. The biology of the vagina in the human subject. *BJOG:  
928 An International Journal of Obstetrics & Gynaecology* 41:208-226.
- 929 87. Farage MA, Miller KW, Sobel JD. 2010. Dynamics of the Vaginal Ecosystem—Hormonal  
930 Influences. *Infectious Diseases: Research and Treatment* 3:IDRT.S3903.
- 931 88. Subramaniam A, Kumar R, Cliver SP, Zhi D, Szychowski JM, Abramovici A, Biggio JR,  
932 Lefkowitz EJ, Morrow C, Edwards RK. 2016. Vaginal Microbiota in Pregnancy: Evaluation  
933 Based on Vaginal Flora, Birth Outcome, and Race. *Am J Perinatol* 33:401-8.
- 934 89. Kindinger LM, Bennett PR, Lee YS, Marchesi JR, Smith A, Cacciatore S, Holmes E,  
935 Nicholson JK, Teoh TG, MacIntyre DA. 2017. The interaction between vaginal microbiota,  
936 cervical length, and vaginal progesterone treatment for preterm birth risk. *Microbiome*  
937 5:6.
- 938 90. Stafford GP, Parker JL, Amabebe E, Kistler J, Reynolds S, Stern V, Paley M, Anumba DOC.  
939 2017. Spontaneous Preterm Birth Is Associated with Differential Expression of Vaginal  
940 Metabolites by Lactobacilli-Dominated Microflora. *Front Physiol* 8:615.
- 941 91. Freitas AC, Bocking A, Hill JE, Money DM, Money D, Bocking A, Hemmingsen S, Hill J,  
942 Reid G, Dumonceaux T, Gloor G, Links M, O'Doherty K, Tang P, van Schalkwyk J, Yudin M,  
943 the VRG. 2018. Increased richness and diversity of the vaginal microbiota and  
944 spontaneous preterm birth. *Microbiome* 6:117.
- 945 92. Li D, Chi XZ, Zhang L, Chen R, Cao JR, Sun XY, Yang HQ, Liao QP. 2020. Vaginal  
946 microbiome analysis of healthy women during different periods of gestation. *Biosci Rep*  
947 40.
- 948 93. Blostein F, Gelaye B, Sanchez SE, Williams MA, Foxman B. 2020. Vaginal microbiome  
949 diversity and preterm birth: results of a nested case-control study in Peru. *Ann  
950 Epidemiol* 41:28-34.
- 951 94. Sroka-Oleksiak A, Gosiewski T, Pabian W, Gurgul A, Kapusta P, Ludwig-Słomczyńska AH,  
952 Wołkow PP, Brzychczy-Włoch M. 2020. Next-Generation Sequencing as a Tool to Detect  
953 Vaginal Microbiota Disturbances during Pregnancy. *Microorganisms* 8:1813.
- 954 95. Stout MJ, Zhou Y, Wylie KM, Tarr PI, Macones GA, Tuuli MG. 2017. Early pregnancy  
955 vaginal microbiome trends and preterm birth. *American Journal of Obstetrics and  
956 Gynecology* 217:356.e1-356.e18.

- 957 96. Romero R, Gomez-Lopez N, Winters AD, Jung E, Shaman M, Bieda J, Panaitescu B,  
958 Pacora P, Erez O, Greenberg JM, Ahmad MM, Hsu CD, Theis KR. 2019. Evidence that  
959 intra-amniotic infections are often the result of an ascending invasion - a molecular  
960 microbiological study. *J Perinat Med* 47:915-931.
- 961 97. Amabebe E, Anumba DOC. 2018. The Vaginal Microenvironment: The Physiologic Role of  
962 Lactobacilli. *Front Med (Lausanne)* 5:181.
- 963 98. Aldunate M, Srbinovski D, Hearps AC, Latham CF, Ramsland PA, Gugasyan R, Cone RA,  
964 Tachedjian G. 2015. Antimicrobial and immune modulatory effects of lactic acid and  
965 short chain fatty acids produced by vaginal microbiota associated with eubiosis and  
966 bacterial vaginosis. *Front Physiol* 6:164.
- 967 99. Hearps AC, Tyssen D, Srbinovski D, Bayigga L, Diaz DJ, Aldunate M, Cone RA, Gugasyan  
968 R, Anderson DJ, Tachedjian G. 2017. Vaginal lactic acid elicits an anti-inflammatory  
969 response from human cervicovaginal epithelial cells and inhibits production of pro-  
970 inflammatory mediators associated with HIV acquisition. *Mucosal Immunol* 10:1480-  
971 1490.
- 972 100. Delgado-Diaz DJ, Tyssen D, Hayward JA, Gugasyan R, Hearps AC, Tachedjian G. 2019.  
973 Distinct Immune Responses Elicited From Cervicovaginal Epithelial Cells by Lactic Acid  
974 and Short Chain Fatty Acids Associated With Optimal and Non-optimal Vaginal  
975 Microbiota. *Front Cell Infect Microbiol* 9:446.
- 976 101. Mandal S, Van Treuren W, White RA, Eggesbø M, Knight R, Peddada SD. 2015. Analysis  
977 of composition of microbiomes: a novel method for studying microbial composition.  
978 *Microb Ecol Health Dis* 26:27663.
- 979 102. Oakley BB, Fiedler TL, Marrazzo JM, Fredricks DN. 2008. Diversity of human vaginal  
980 bacterial communities and associations with clinically defined bacterial vaginosis. *Appl*  
981 *Environ Microbiol* 74:4898-909.
- 982 103. Lamont RF, Sobel JD, Akins RA, Hassan SS, Chaiworapongsa T, Kusanovic JP, Romero R.  
983 2011. The vaginal microbiome: new information about genital tract flora using  
984 molecular based techniques. *Bjog* 118:533-49.
- 985 104. Pace RM, Chu DM, Prince AL, Ma J, Seferovic MD, Aagaard KM. 2021. Complex species  
986 and strain ecology of the vaginal microbiome from pregnancy to postpartum and  
987 association with preterm birth. *Med (N Y)* 2:1027-1049.
- 988 105. Rowe JH, Ertelt JM, Xin L, Way SS. 2012. Pregnancy imprints regulatory memory that  
989 sustains anergy to fetal antigen. *Nature* 490:102-6.
- 990 106. Gamliel M, Goldman-Wohl D, Isaacson B, Gur C, Stein N, Yamin R, Berger M, Grunewald  
991 M, Keshet E, Rais Y, Bornstein C, David E, Jelinski A, Eisenberg I, Greenfield C, Ben-David  
992 A, Imbar T, Gilad R, Haimov-Kochman R, Mankuta D, Elami-Suzin M, Amit I, Hanna JH,  
993 Yagel S, Mandelboim O. 2018. Trained Memory of Human Uterine NK Cells Enhances  
994 Their Function in Subsequent Pregnancies. *Immunity* 48:951-962 e5.
- 995 107. Feyaerts D, Joosten I, van der Molen RG. 2021. A pregnancy to remember: trained  
996 immunity of the uterine mucosae. *Mucosal Immunol* 14:539-541.
- 997 108. Gregory EJ, Liu J, Miller-Handley H, Kinder JM, Way SS. 2021. Epidemiology of Pregnancy  
998 Complications Through the Lens of Immunological Memory. *Front Immunol* 12:693189.

- 999 109. Kervinen K, Holster T, Saqib S, Virtanen S, Stefanovic V, Rahkonen L, Nieminen P,  
1000 Salonen A, Kalliala I. 2021. Parity and gestational age are associated with vaginal  
1001 microbiota composition in term and late term pregnancies.
- 1002 110. Koren O, Goodrich JK, Cullender TC, Spor A, Laitinen K, Bäckhed HK, Gonzalez A, Werner  
1003 JJ, Angenent LT, Knight R, Bäckhed F, Isolauri E, Salminen S, Ley RE. 2012. Host  
1004 remodeling of the gut microbiome and metabolic changes during pregnancy. *Cell*  
1005 150:470-80.
- 1006 111. Allen NG, Edupuganti L, Edwards DJ, Jimenez NR, Buck GA, Jefferson KK, Strauss JF, 3rd,  
1007 Wickham EP, 3rd, Fettweis JM. 2022. The vaginal microbiome in women of reproductive  
1008 age with healthy weight versus overweight/obesity. *Obesity (Silver Spring)* 30:142-152.
- 1009 112. Beaumont M, Goodrich JK, Jackson MA, Yet I, Davenport ER, Vieira-Silva S, Debelius J,  
1010 Pallister T, Mangino M, Raes J, Knight R, Clark AG, Ley RE, Spector TD, Bell JT. 2016.  
1011 Heritable components of the human fecal microbiome are associated with visceral fat.  
1012 *Genome Biol* 17:189.
- 1013 113. Sze MA, Schloss PD. 2016. Looking for a Signal in the Noise: Revisiting Obesity and the  
1014 Microbiome. *mBio* 7.
- 1015 114. de la Cuesta-Zuluaga J, Corrales-Agudelo V, Carmona JA, Abad JM, Escobar JS. 2018.  
1016 Body size phenotypes comprehensively assess cardiometabolic risk and refine the  
1017 association between obesity and gut microbiota. *Int J Obes (Lond)* 42:424-432.
- 1018 115. Kaplan RC, Wang Z, Usyk M, Sotres-Alvarez D, Daviglius ML, Schneiderman N, Talavera  
1019 GA, Gellman MD, Thyagarajan B, Moon JY, Vázquez-Baeza Y, McDonald D, Williams-  
1020 Nguyen JS, Wu MC, North KE, Shaffer J, Sollecito CC, Qi Q, Isasi CR, Wang T, Knight R,  
1021 Burk RD. 2019. Gut microbiome composition in the Hispanic Community Health  
1022 Study/Study of Latinos is shaped by geographic relocation, environmental factors, and  
1023 obesity. *Genome Biol* 20:219.
- 1024 116. Visser M, Bouter LM, McQuillan GM, Wener MH, Harris TB. 1999. Elevated C-reactive  
1025 protein levels in overweight and obese adults. *Jama* 282:2131-5.
- 1026 117. Berg AH, Scherer PE. 2005. Adipose tissue, inflammation, and cardiovascular disease.  
1027 *Circ Res* 96:939-49.
- 1028 118. Rocha VZ, Libby P. 2009. Obesity, inflammation, and atherosclerosis. *Nat Rev Cardiol*  
1029 6:399-409.
- 1030 119. Ellulu MS, Patimah I, Khaza'ai H, Rahmat A, Abed Y. 2017. Obesity and inflammation: the  
1031 linking mechanism and the complications. *Arch Med Sci* 13:851-863.
- 1032 120. Turjeman S, Collado MC, Koren O. 2021. The gut microbiome in pregnancy and  
1033 pregnancy complications. *Current Opinion in Endocrine and Metabolic Research* 18:133-  
1034 138.
- 1035 121. Zakaria ZZ, Al-Rumaihi S, Al-Absi RS, Farah H, Elamin M, Nader R, Bouabidi S, Suleiman  
1036 SE, Nasr S, Al-Asmakh M. 2022. Physiological Changes and Interactions Between  
1037 Microbiome and the Host During Pregnancy. *Front Cell Infect Microbiol* 12:824925.
- 1038 122. Boris S, Barbés C. 2000. Role played by lactobacilli in controlling the population of  
1039 vaginal pathogens. *Microbes and Infection* 2:543-546.
- 1040 123. Boskey ER, Cone RA, Whaley KJ, Moench TR. 2001. Origins of vaginal acidity: high d/l  
1041 lactate ratio is consistent with bacteria being the primary source. *Human Reproduction*  
1042 16:1809-1813.

- 1043 124. Wilks M, Wiggins R, Whiley A, Hennessy E, Warwick S, Porter H, Corfield A, Millar M.  
1044 2004. Identification and H<sub>2</sub>O<sub>2</sub> production of vaginal lactobacilli from pregnant  
1045 women at high risk of preterm birth and relation with outcome. *Journal of clinical*  
1046 *microbiology* 42:713-717.
- 1047 125. Borgdorff H, Tsvitvadze E, Verhelst R, Marzorati M, Jurriaans S, Ndayisaba GF, Schuren  
1048 FH, van de Wijgert JHHM. 2014. Lactobacillus-dominated cervicovaginal microbiota  
1049 associated with reduced HIV/STI prevalence and genital HIV viral load in African women.  
1050 *The ISME Journal* 8:1781-1793.
- 1051 126. van de Wijgert JHHM, Borgdorff H, Verhelst R, Crucitti T, Francis S, Verstraelen H,  
1052 Jaspers V. 2014. The Vaginal Microbiota: What Have We Learned after a Decade of  
1053 Molecular Characterization? *PLOS ONE* 9:e105998.
- 1054 127. Witkin SS, Mendes-Soares H, Linhares IM, Jayaram A, Ledger WJ, Forney LJ. 2014.  
1055 Influence of Vaginal Bacteria and d- and  
1056 l-Lactic Acid Isomers on Vaginal  
1057 Extracellular Matrix Metalloproteinase Inducer: Implications for Protection against  
1058 Upper Genital Tract Infections. *mBio* 5:e00874-14.
- 1059 128. Thompson R, DeJong K, Lo J. 2019. Marijuana Use in Pregnancy: A Review. *Obstet*  
1060 *Gynecol Surv* 74:415-428.
- 1061 129. Gesterling L, Bradford H. 2022. Cannabis Use in Pregnancy: A State of the Science  
1062 Review. *J Midwifery Womens Health* 67:305-313.
- 1063 130. O'Callaghan JL, Willner D, Buttini M, Huygens F, Pelzer ES. 2021. Limitations of 16S rRNA  
1064 Gene Sequencing to Characterize Lactobacillus Species in the Upper Genital Tract. *Front*  
1065 *Cell Dev Biol* 9:641921.
- 1066 131. Klebanoff SJ, Hillier SL, Eschenbach DA, Waltersdorff AM. 1991. Control of the  
1067 microbial flora of the vagina by H<sub>2</sub>O<sub>2</sub>-generating lactobacilli. *J Infect Dis* 164:94-100.
- 1068 132. Tachedjian G, Aldunate M, Bradshaw CS, Cone RA. 2017. The role of lactic acid  
1069 production by probiotic Lactobacillus species in vaginal health. *Res Microbiol* 168:782-  
1070 792.
- 1071 133. France MT, Mendes-Soares H, Forney LJ. 2016. Genomic Comparisons of Lactobacillus  
1072 crispatus and Lactobacillus iners Reveal Potential Ecological Drivers of Community  
1073 Composition in the Vagina. *Appl Environ Microbiol* 82:7063-7073.
- 1074 134. Zheng N, Guo R, Wang J, Zhou W, Ling Z. 2021. Contribution of Lactobacillus iners to  
1075 Vaginal Health and Diseases: A Systematic Review. *Front Cell Infect Microbiol*  
1076 11:792787.
- 1077 135. Tachedjian G, O'Hanlon DE, Ravel J. 2018. The implausible "in vivo" role of hydrogen  
1078 peroxide as an antimicrobial factor produced by vaginal microbiota. *Microbiome* 6:29.
- 1079 136. Morrill S, Gilbert NM, Lewis AL. 2020. Gardnerella vaginalis as a Cause of Bacterial  
1080 Vaginosis: Appraisal of the Evidence From in vivo Models. *Front Cell Infect Microbiol*  
1081 10:168.
- 1082 137. Bretelle F, Rozenberg P, Pascal A, Favre R, Bohec C, Loundou A, Senat MV, Aissi G,  
1083 Lesavre N, Brunet J, Heckenroth H, Luton D, Raoult D, Fenollar F. 2015. High Atopobium  
1084 vaginae and Gardnerella vaginalis vaginal loads are associated with preterm birth. *Clin*  
1085 *Infect Dis* 60:860-7.



- 1086 138. Price JT, Vwalika B, France M, Ravel J, Ma B, Mwape H, Rittenhouse KJ, De Paris K, Hobbs  
1087 M, Nelson JA, Kasaro MP, Stringer EM, Stringer JSA. 2022. HIV-associated vaginal  
1088 microbiome and inflammation predict spontaneous preterm birth in Zambia. *Sci Rep*  
1089 12:8573.
- 1090 139. Florova V, Romero R, Tarca AL, Galaz J, Motomura K, Ahmad MM, Hsu CD, Hsu R, Tong  
1091 A, Ravel J, Theis KR, Gomez-Lopez N. 2021. Vaginal host immune-microbiome  
1092 interactions in a cohort of primarily African-American women who ultimately  
1093 underwent spontaneous preterm birth or delivered at term. *Cytokine* 137:155316.
- 1094 140. Pruski P, Correia GDS, Lewis HV, Capuccini K, Inglese P, Chan D, Brown RG, Kindinger L,  
1095 Lee YS, Smith A, Marchesi J, McDonald JAK, Cameron S, Alexander-Hardiman K, David  
1096 AL, Stock SJ, Norman JE, Terzidou V, Teoh TG, Sykes L, Bennett PR, Takats Z, MacIntyre  
1097 DA. 2021. Direct on-swab metabolic profiling of vaginal microbiome host interactions  
1098 during pregnancy and preterm birth. *Nat Commun* 12:5967.
- 1099 141. Kozich JJ, Westcott SL, Baxter NT, Highlander SK, Schloss PD. 2013. Development of a  
1100 dual-index sequencing strategy and curation pipeline for analyzing amplicon sequence  
1101 data on the MiSeq Illumina sequencing platform. *Appl Environ Microbiol* 79:5112-20.
- 1102 142. Callahan BJ, McMurdie PJ, Rosen MJ, Han AW, Johnson AJ, Holmes SP. 2016. DADA2:  
1103 High-resolution sample inference from Illumina amplicon data. *Nat Methods* 13:581-3.
- 1104 143. R Core Development Team. 2019. R: A language and environment for statistical  
1105 computing, R Foundation for Statistical Computing, Vienna, Austria. [https://www.R-](https://www.R-project.org)  
1106 [project.org](https://www.R-project.org).
- 1107 144. Theis KR, Romero R, Winters AD, Jobe AH, Gomez-Lopez N. 2020. Lack of Evidence for  
1108 Microbiota in the Placental and Fetal Tissues of Rhesus Macaques. *mSphere* 5.
- 1109 145. Davis NM, Proctor DM, Holmes SP, Relman DA, Callahan BJ. 2018. Simple statistical  
1110 identification and removal of contaminant sequences in marker-gene and  
1111 metagenomics data. *Microbiome* 6:226.
- 1112 146. Schloss PD, Westcott SL, Ryabin T, Hall JR, Hartmann M, Hollister EB, Lesniewski RA,  
1113 Oakley BB, Parks DH, Robinson CJ, Sahl JW, Stres B, Thallinger GG, Van Horn DJ, Weber  
1114 CF. 2009. Introducing mothur: open-source, platform-independent, community-  
1115 supported software for describing and comparing microbial communities. *Appl Environ*  
1116 *Microbiol* 75:7537-41.
- 1117 147. Anderson MJ. 2005. Permutational multivariate analysis of variance. Department of  
1118 Statistics, University of Auckland, Auckland. 26(32-46).
- 1119 148. Oksanen J, Blanchet F, Friendly M, Kindt R, Legendre P, McGlenn D, Minchi P, O'Hara R,  
1120 Simpson G, Solymos P, Stevens H, Szoecs E, Wagner H. 2019. vegan: Community ecology  
1121 package. R package version 2.5-6., R Foundation for Statistical Computing,  
1122 <https://CRAN.R-project.org/package=vegan>.
- 1123 149. Peschel S, Müller CL, von Mutius E, Boulesteix AL, Depner M. 2021. NetCoMi: network  
1124 construction and comparison for microbiome data in R. *Brief Bioinform* 22.
- 1125 150. Clauset A, Newman ME, Moore C. 2004. Finding community structure in very large  
1126 networks. *Phys Rev E Stat Nonlin Soft Matter Phys* 70:066111.

1128

1129 **TABLES**

1130

1131 **Table 1.** Clinical and demographic characteristics of the study population.

1132

1133

|                                                    | <b>Term Birth<br/>(n = 474)</b> |              |
|----------------------------------------------------|---------------------------------|--------------|
| Maternal age (years; median [IQR])                 | 24 (21-27)                      | 1136         |
| Body mass index (kg/m <sup>2</sup> ; median [IQR]) | 27.5 (22.7-33.7) <sup>a</sup>   | 1137<br>1138 |
| Primiparity                                        | 20.9% (99/474)                  | 1139         |
| Race/Ethnicity                                     |                                 | 1140<br>1141 |
| African-American                                   | 94.5% (448/474)                 | 1142         |
| White                                              | 1.7% (8/474)                    | 1143<br>1144 |
| Asian                                              | 0.2% (1/474)                    | 1145         |
| Hispanic                                           | 0.2% (1/474)                    | 1146         |
| Other                                              | 3.4% (16/474)                   | 1147<br>1148 |
| Gestational age at delivery (weeks; median [IQR])  | 39.6 (39-40.4)                  | 1149<br>1150 |
| Cesarean Section                                   | 25.9% (123/474)                 | 1151         |
| Fetal sex                                          |                                 | 1152<br>1153 |
| Female                                             | 48.7% (231/474)                 | 1154         |
| Male                                               | 51.3% (243/474)                 | 1155<br>1156 |
| Birthweight (grams; median [IQR])                  | 3286 (3091-3580)                | 1157<br>1158 |

1159

1160 Data are given as median (interquartile range, IQR) and percentage (n/N). <sup>a</sup>Two missing data

1161

1162 **Table 2.** Differences in alpha diversity values (Chao1 richness, Shannon, and Simpson diversity)  
1163 of the vaginal microbiota profiles of women who delivered at term.

1164  
1165  
1166  
1167  
1168  
1169  
1170  
1171  
1172  
1173  
1174  
1175  
1176  
1177  
1178  
1179  
1180  
1181

| Diversity | Covariate                        | Estimate | p     |
|-----------|----------------------------------|----------|-------|
| Chao1     | Gestational age*                 | -2.41    | 0.000 |
| Chao1     | Obese                            | 4.19     | 0.033 |
| Shannon   | Gestational age*                 | -0.08    | 0.000 |
| Shannon   | Parity                           | 0.09     | 0.000 |
| Shannon   | Ethnicity Hispanic/Latino        | -0.40    | 0.024 |
| Simpson   | Gestational age*                 | 0.56     | 0.000 |
| Simpson   | Age**                            | -0.02    | 0.000 |
| Simpson   | Parity                           | 0.03     | 0.000 |
| Simpson   | Ethnicity Hispanic/Latino        | -0.23    | 0.003 |
| Simpson   | Race other than African-American | 0.14     | 0.014 |

1182  
1183 \*Gestational age was centered at 8 weeks and then scaled by 4, therefore the change in diversity  
1184 corresponds to a four week interval

1185 \*\*Maternal age was scaled by 5, therefore the diversity corresponds to a 5 year increase in maternal  
1186 age  
1187

1188 **Table 3.** Factors associated with variation in vaginal community state type (CST) membership  
 1189 among women who delivered at term.

| CST  | Covariate        | Odds Ratio | p     |
|------|------------------|------------|-------|
| I    | Gestational age* | 1.77       | 0.000 |
| I    | Marijuana use    | 0.41       | 0.278 |
| I    | Sex male         | 0.73       | 0.650 |
| I    | Age**            | 1.81       | 0.211 |
| I    | Parity           | 0.71       | 0.264 |
| II   | Gestational age* | 0.88       | 0.479 |
| II   | Marijuana use    | 1.24       | 0.880 |
| II   | Sex male         | 2.12       | 0.605 |
| II   | Age**            | 2.07       | 0.362 |
| II   | Parity           | 0.72       | 0.593 |
| III  | Gestational age* | 1.20       | 0.000 |
| III  | Marijuana use    | 1.83       | 0.006 |
| III  | Sex male         | 1.08       | 0.714 |
| III  | Age**            | 0.64       | 0.001 |
| III  | Parity           | 1.04       | 0.684 |
| IV-A | Gestational age* | 0.69       | 0.000 |
| IV-A | Marijuana use    | 1.56       | 0.292 |
| IV-A | Sex male         | 0.61       | 0.194 |
| IV-A | Age**            | 1.18       | 0.532 |
| IV-A | Parity           | 1.16       | 0.364 |
| IV-B | Gestational age* | 0.75       | 0.000 |
| IV-B | Marijuana use    | 0.86       | 0.541 |
| IV-B | Sex male         | 1.60       | 0.039 |
| IV-B | Age**            | 0.77       | 0.102 |
| IV-B | Parity           | 1.46       | 0.000 |
| V    | Gestational age* | 1.33       | 0.006 |
| V    | Marijuana use    | 1.16       | 0.849 |
| V    | Sex male         | 0.90       | 0.890 |
| V    | Age**            | 0.99       | 0.987 |
| V    | Parity           | 0.93       | 0.815 |

1227 \*Gestational age was scaled by 4, therefore the Odds Ratio corresponds to a four week interval

1228 \*\*Maternal age was scaled by 5, therefore the Odds Ratio corresponds to 5 year increase in  
 1229 maternal age

1230

1231 **FIGURE LEGENDS**

1232

1233 **Figure 1. Gestational ages at the time of vaginal fluid sample collection in a cohort of women**  
1234 **ultimately delivering at term.** (A) 1,862 vaginal fluid samples were collected from 474 pregnant  
1235 women between 8 and 38<sup>+6</sup> weeks of gestation. The vaginal microbiota was profiled using 16S  
1236 rRNA gene sequencing. (B) Each line corresponds to one patient and each dot to a sample for  
1237 which the vaginal microbiota was characterized. Gestational ages at delivery are shown using red  
1238 triangles.

1239

1240 **Figure 2. Decrease in alpha diversity of the vaginal microbiota with gestational age in women**  
1241 **ultimately delivering at term.** Graphical representation of low and high bacterial community  
1242 richness (A) and evenness (B). Linear mixed-effects models illustrating decreases of bacterial  
1243 community richness (C) and evenness (D) over the course of gestation. Each dot corresponds to  
1244 one sample. The red line represents the linear fit using linear mixed-effects models. The dark blue  
1245 line represents the model fit and light blue areas define the 95% confidence intervals derived from  
1246 generalized additive models with splines transformation of gestational age.

1247

1248 **Figure 3. Rate of decrease in alpha diversity (Shannon diversity index) of the vaginal**  
1249 **microbiota with gestational age is steeper in women with higher baseline diversity.** The left  
1250 panel shows the baseline diversity for each patient (blue dots) and corresponding 95% confidence  
1251 intervals (black lines). The right panel shows the rate of change in diversity (blue dots) and  
1252 confidence intervals (black lines). Women who had higher baseline diversity had steeper decrease

1253 in diversity with advancing gestation (correlation between random intercepts and random slopes  
1254 of -0.79).

1255

1256 **Figure 4. Variation in the community state type (CST) of the vaginal microbiota throughout**  
1257 **gestation among women who ultimately delivered at term.** (A) Heatmap illustrating the relative  
1258 abundances of the 30 most abundant amplicon sequence variants (ASVs) among the vaginal 16S  
1259 rRNA gene profiles. The bar on top indicates vaginal CSTs assigned using the program  
1260 VALENCIA ([11](#)). (B) Dynamics of vaginal CST prevalence as a function of gestational age among  
1261 women ultimately delivering at term. The log-odds of membership for each CST were modeled  
1262 using binomial linear-mixed effects models. Fixed effects in these models included gestational age  
1263 (linear and quadratic terms, as needed) and maternal characteristics, while one random intercept  
1264 was allowed for each subject. (C) Alluvial plot illustrating the temporal dynamics of vaginal CST  
1265 prevalence and transitions among 309 women who delivered at term and contributed one sample  
1266 per each of the four discrete time points (10 to 37 weeks).

1267

1268 **Figure 5. Changes in the relative abundance of amplicon sequence variants (ASVs) in vaginal**  
1269 **16S rRNA gene profiles across gestational age in women who ultimately delivered at term.**  
1270 Only the first ASV for each microbial taxon with a significant corrected p-value ( $q < 0.05$ ) presented  
1271 in Supplemental Table 1 is shown. Panels with positive correlations are ordered before those with  
1272 negative correlations. Each dot within an individual panel corresponds to one sample. The red lines  
1273 represent linear fits through relative abundance data using linear mixed-effects models. The blue  
1274 lines and grey bands represent the model fits and 95% confidence intervals derived from

1275 generalized additive models, respectively. The green lines represent the estimates from negative  
1276 binomial mixed-effects generalized additive models.

1277

1278 **Figure 6. Amplicon sequence variants (ASVs) classified at the genus level which were**  
1279 **identified as being less or more abundant in the vaginal microbiota with advancing**  
1280 **gestational age.** As gestation advances, *Lactobacillus* , and to a lesser extent Ca. *Lachnocurva*,  
1281 ASVs become more abundant and many members of community state type (CST) IV become less  
1282 abundant.

1283

1284 **Figure 7. Positive correlations of relative abundances of vaginal microbial taxa.** Alluvial plot  
1285 shows pairs of vaginal bacterial taxa with highly correlated relative abundances throughout  
1286 gestation. Relative abundances of amplicon sequence variants (ASVs) were compared using linear  
1287 mixed-effects models.

1288

1289 **Figure 8. Network analysis illustrating changes in associations between amplicon sequence**  
1290 **variants (ASVs) throughout pregnancy.** Networks at (A) 10-24 weeks, (B) 24-28 weeks, (C) 28-  
1291 32 weeks, and (D) 32-37 weeks of gestation were generated using the NetCoMi package ([149](#)).  
1292 Nodes, which represented individual amplicon sequence variants (ASVs) were color coded  
1293 according to their respective genus-level classification. Edges were weighted by strength using  
1294 fitness and color coded by interaction type with positive (blue) and negative (red) interactions.  
1295 Nodes that represent hubs, defined as an ASV with an eigenvector above the 95% quantile of the  
1296 empirical distribution, are outlined in black and are in bold font. Clusters are represented by  
1297 background coloration and darker borders. (E) A matrix of comparative network statistics with

1298 positive edge percentage above the diagonal and natural connectivity below the diagonal. Cells  
1299 shaded red and cells shaded blue represent statistically significant differences in the respective  
1300 time periods for positive edge percentage and natural connectivity, respectively.  
1301



1302 **SUPPLEMENTAL TABLE LEGENDS**

1303 **Supplemental Table 1. Multivariate analysis of relative abundances of amplicon sequence**  
1304 **variants (ASVs) in vaginal 16S rRNA gene data as a function of gestational age, maternal**  
1305 **age, parity, ethnicity, and marijuana use among women who ultimately delivered at term.**

1306 The p-value and false discovery rate adjusted p-value (q-value) are provided for each covariate.  
1307 The coefficients represent changes in log (base e) relative abundance with: (A) one additional  
1308 month of gestational age, (B) 5 additional years of maternal age, (C) use of marijuana, (D) ethnicity  
1309 Hispanic or Latino, (E) race other than African American, and (F) one additional previous delivery.  
1310 ASVs classified at the genus level as *Lactobacillus* were secondarily classified at the species level,  
1311 if possible, using the National Center for Biotechnology Information's BLAST (Basic Local  
1312 Alignment Search Tool). These ASVs are highlighted in blue.

1313

1314 **Supplemental Table 2. Comparison of analyses evaluating the relationship between**  
1315 **gestational age and the vaginal microbiota using absolute abundance analysis (Analysis of**  
1316 **Composition of Microbiomes; ANCOM) and relative abundance analysis (Linear mixed-**  
1317 **effects models; LME).**

1318

1319 **Supplemental Table 3. Vaginal bacterial taxa with highly correlated relative abundances**  
1320 **based on longitudinal sampling in women who ultimately delivered at term.** Significance of  
1321 correlations between log-transformed relative abundances was assessed using linear mixed-  
1322 effects models. In these models one of the two amplicon sequence variants (ASVs) was treated  
1323 as a response while the other as an explanatory variable. A random effect was allowed for each

1324 subject. Naïve spearman correlation coefficients were calculated for each pair of taxa. The p-  
1325 value and false discovery rate-adjusted p-value (q-value) are provided.

1326

1327 **Supplemental Table 4. Top 25 amplicon sequence variants (ASVs) by relative abundance**

1328 **compared to NCBI BLAST bacterial type strains with percent identity.** ASVs were

1329 compared to type strains in the NCBI BLAST database. Highest percentage identity type strains

1330 were listed if not 100%.

1331

1332

1333 **SUPPLEMENTAL FIGURE LEGENDS**

1334 **Supplemental Figure 1. Venn diagram showing the relationship between absolute abundance**  
1335 **analysis (Analysis of Composition of Microbiomes; ANCOM) and relative abundance**  
1336 **analysis (Linear mixed-effects models; LME) in evaluating changes in the structure of the**  
1337 **vaginal microbiota throughout gestation.** The two analyses identified some common significant  
1338 bacterial taxa (i.e., amplicon sequence variants, or ASVs), yet the ANCOM approach tends to be  
1339 more conservative than LME.

1340

Figure 1

A

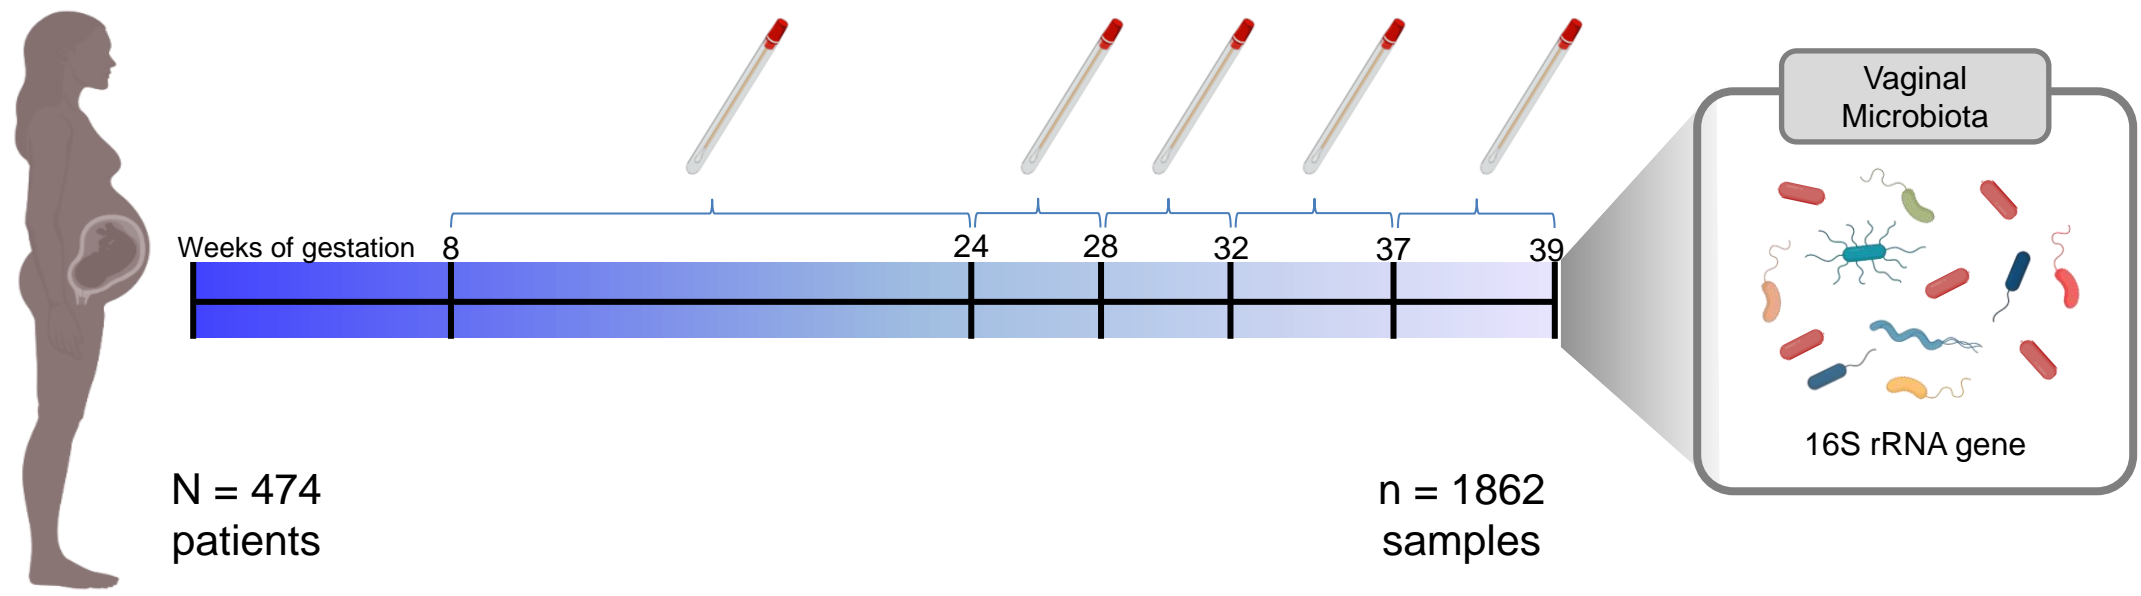

● Gestational age at sample    ▼ Gestational age at delivery

B

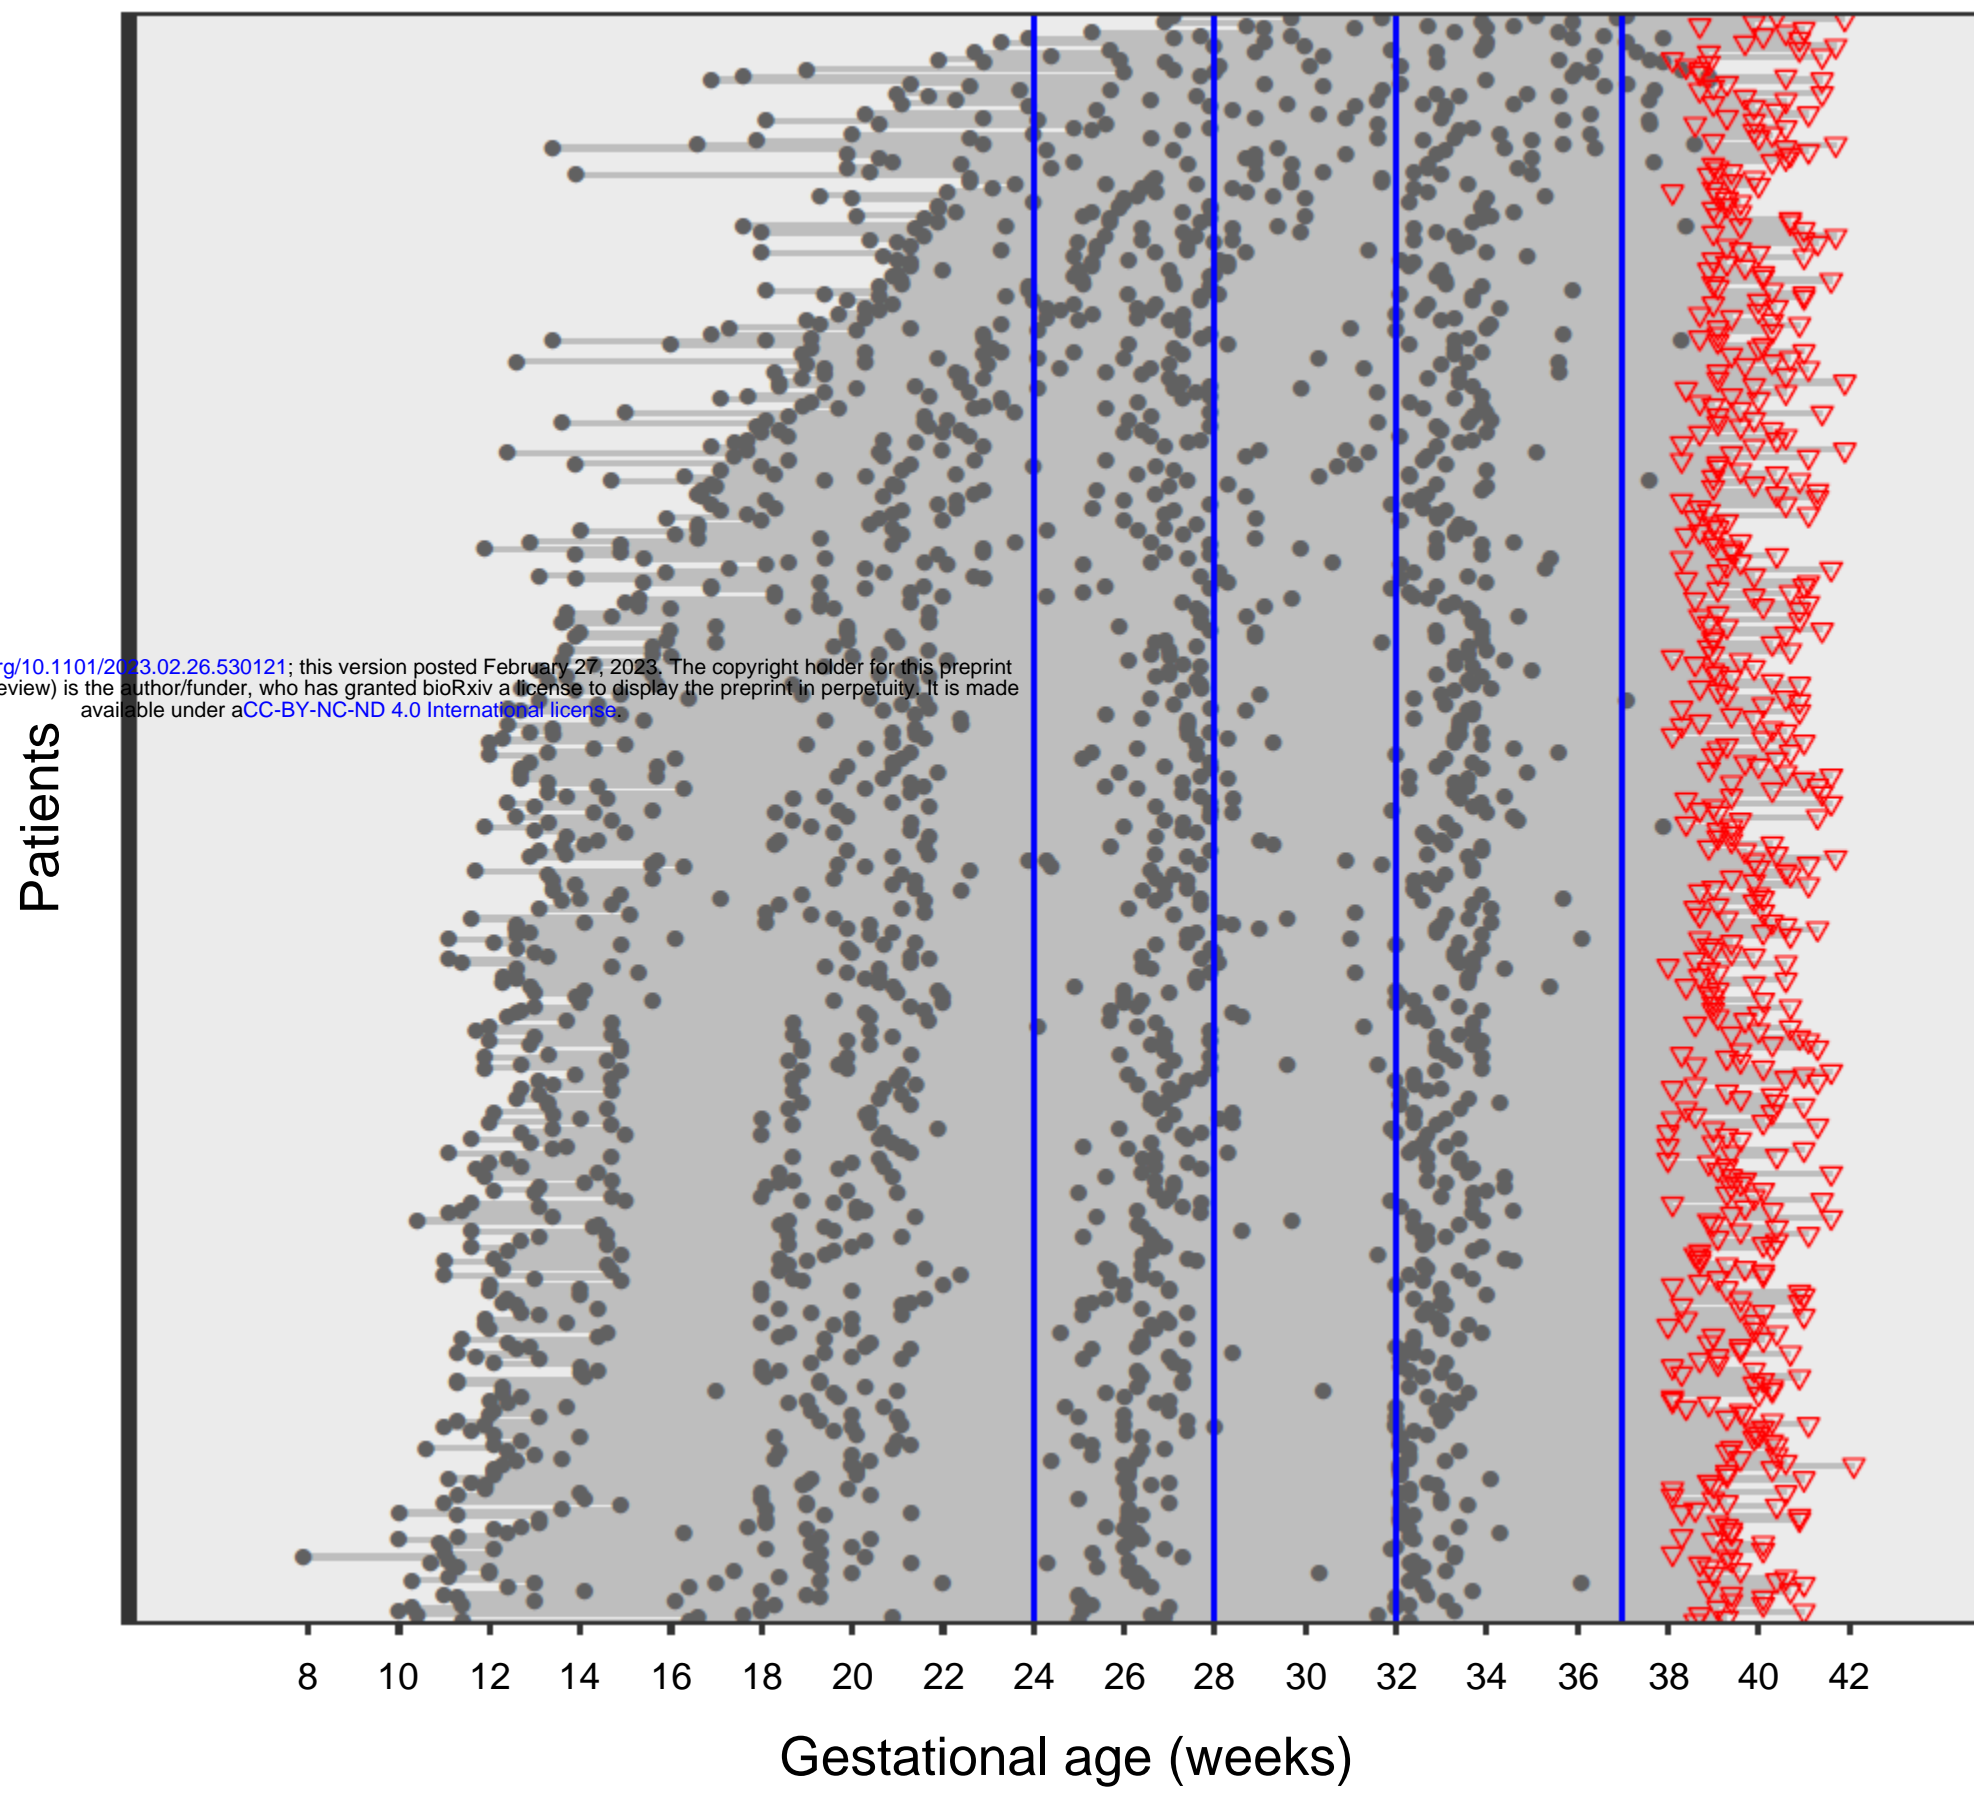

Figure 2

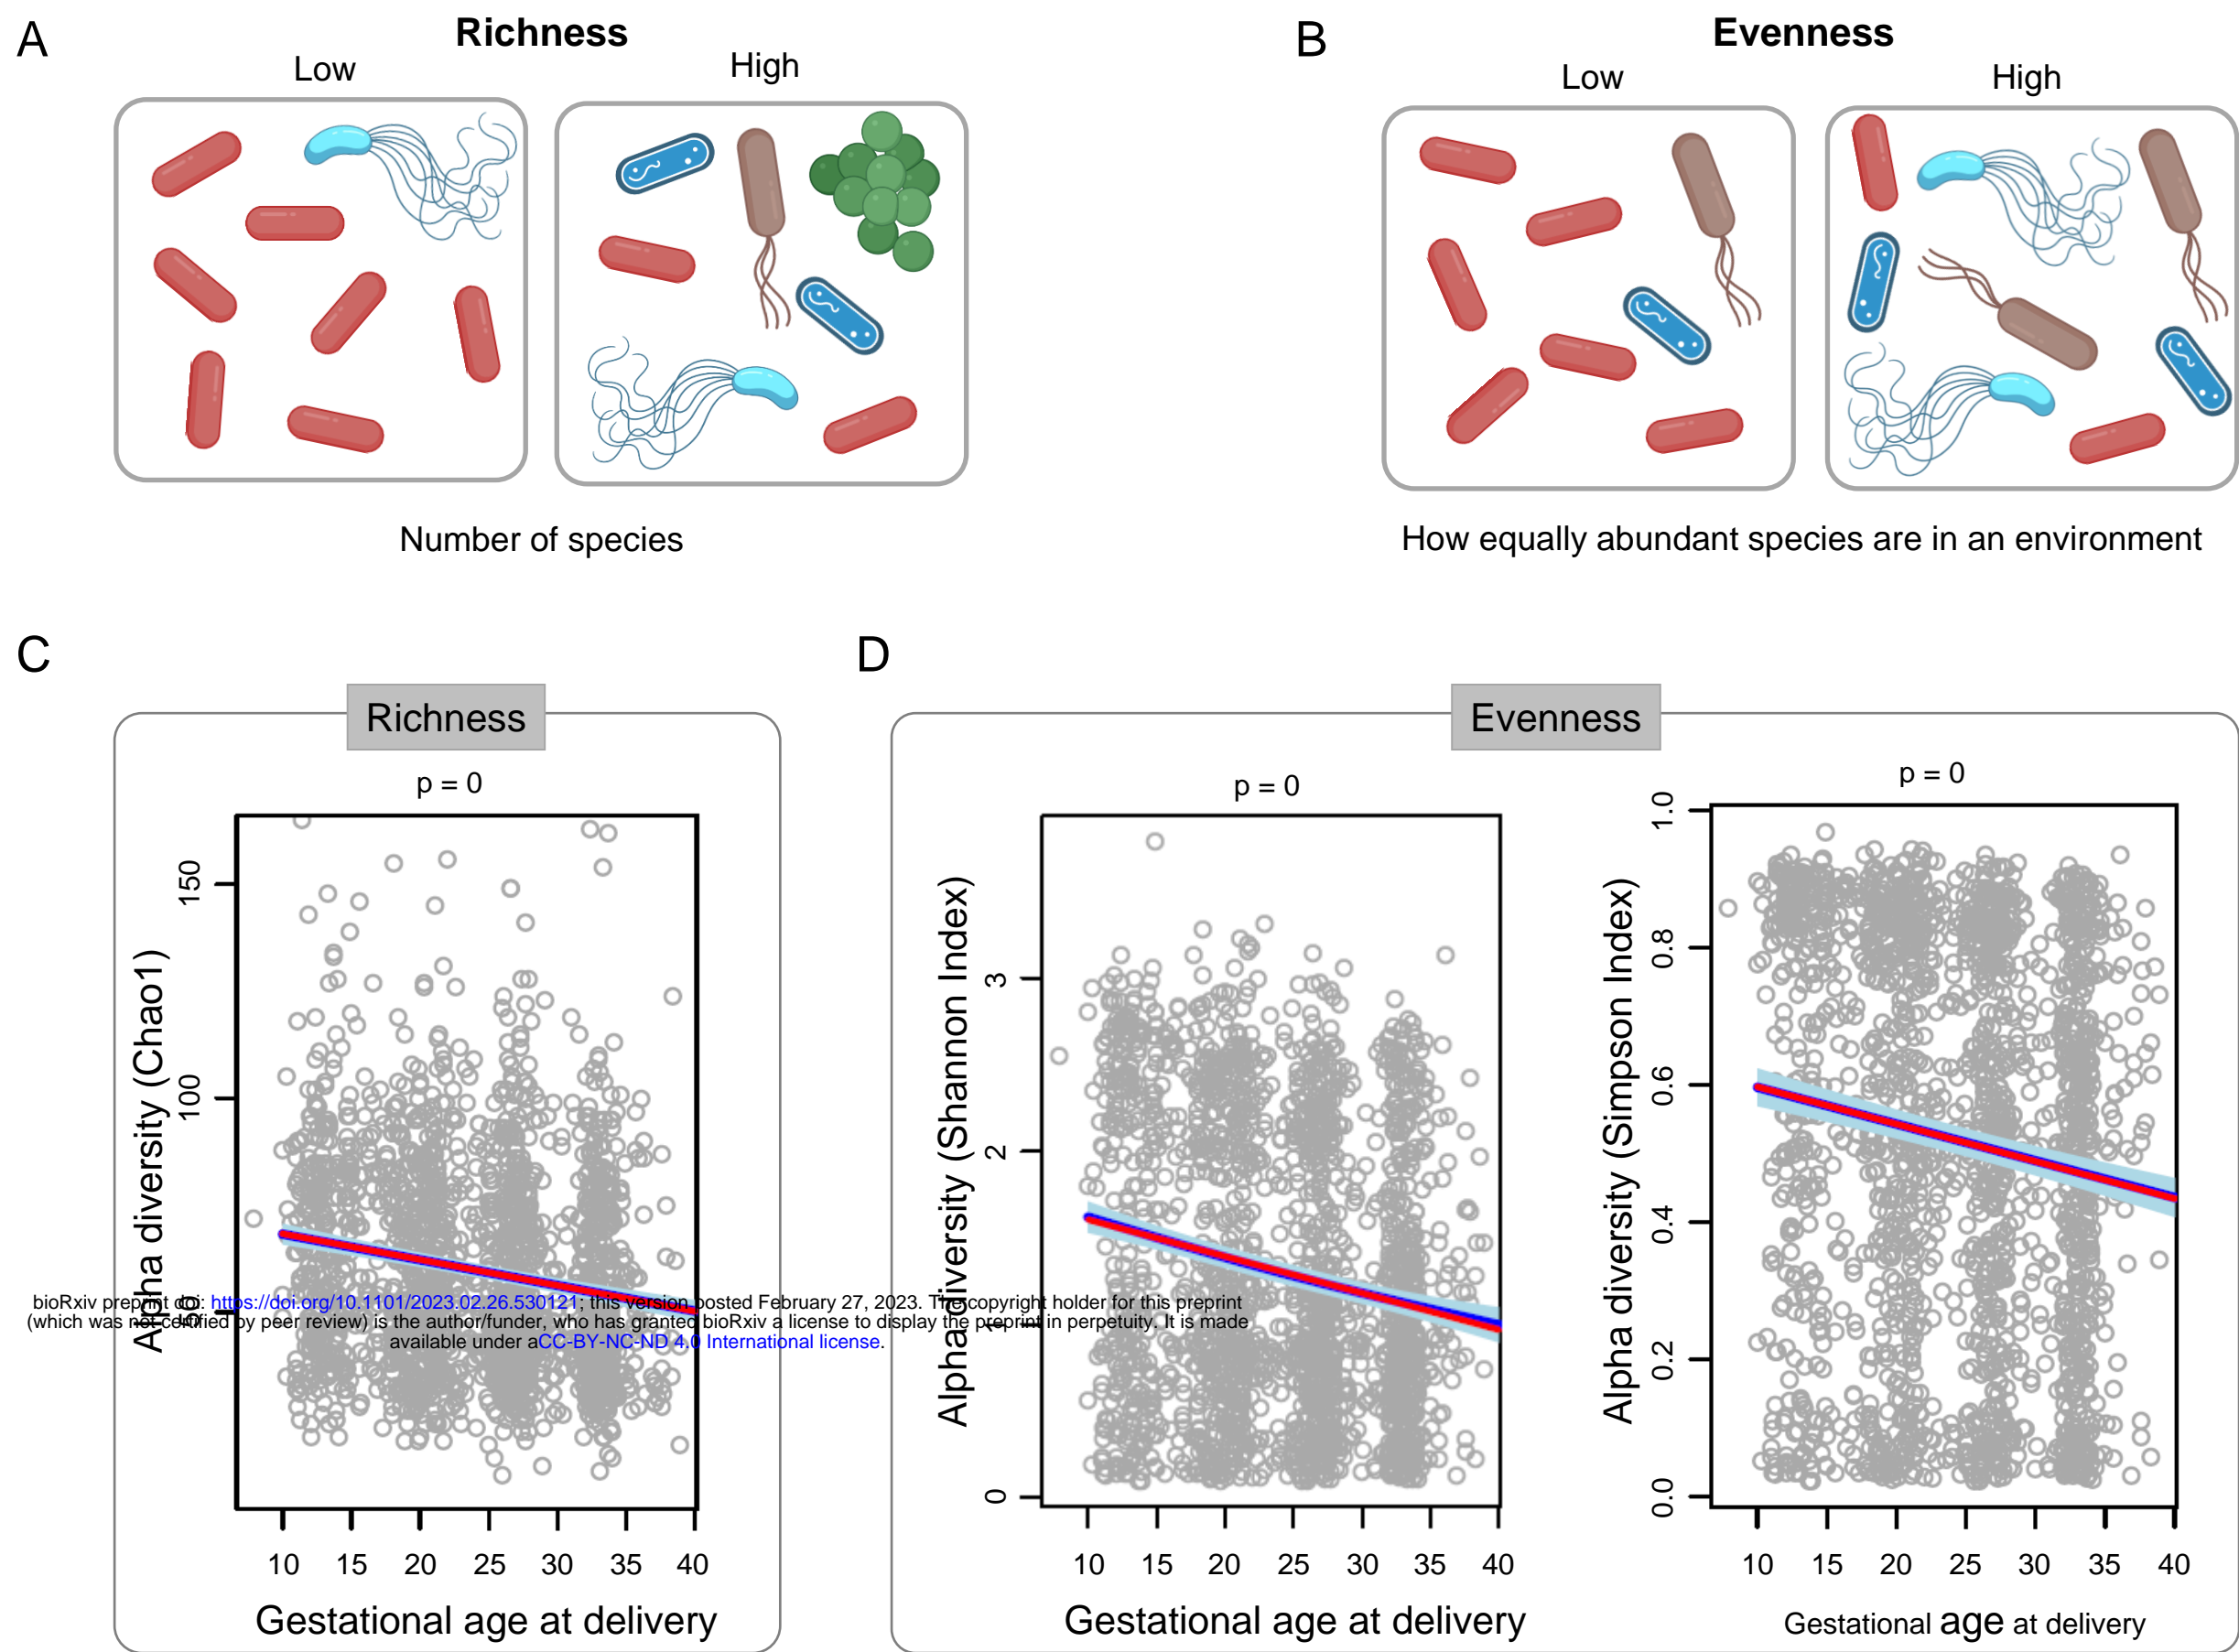

Figure 3

### Shannon Diversity

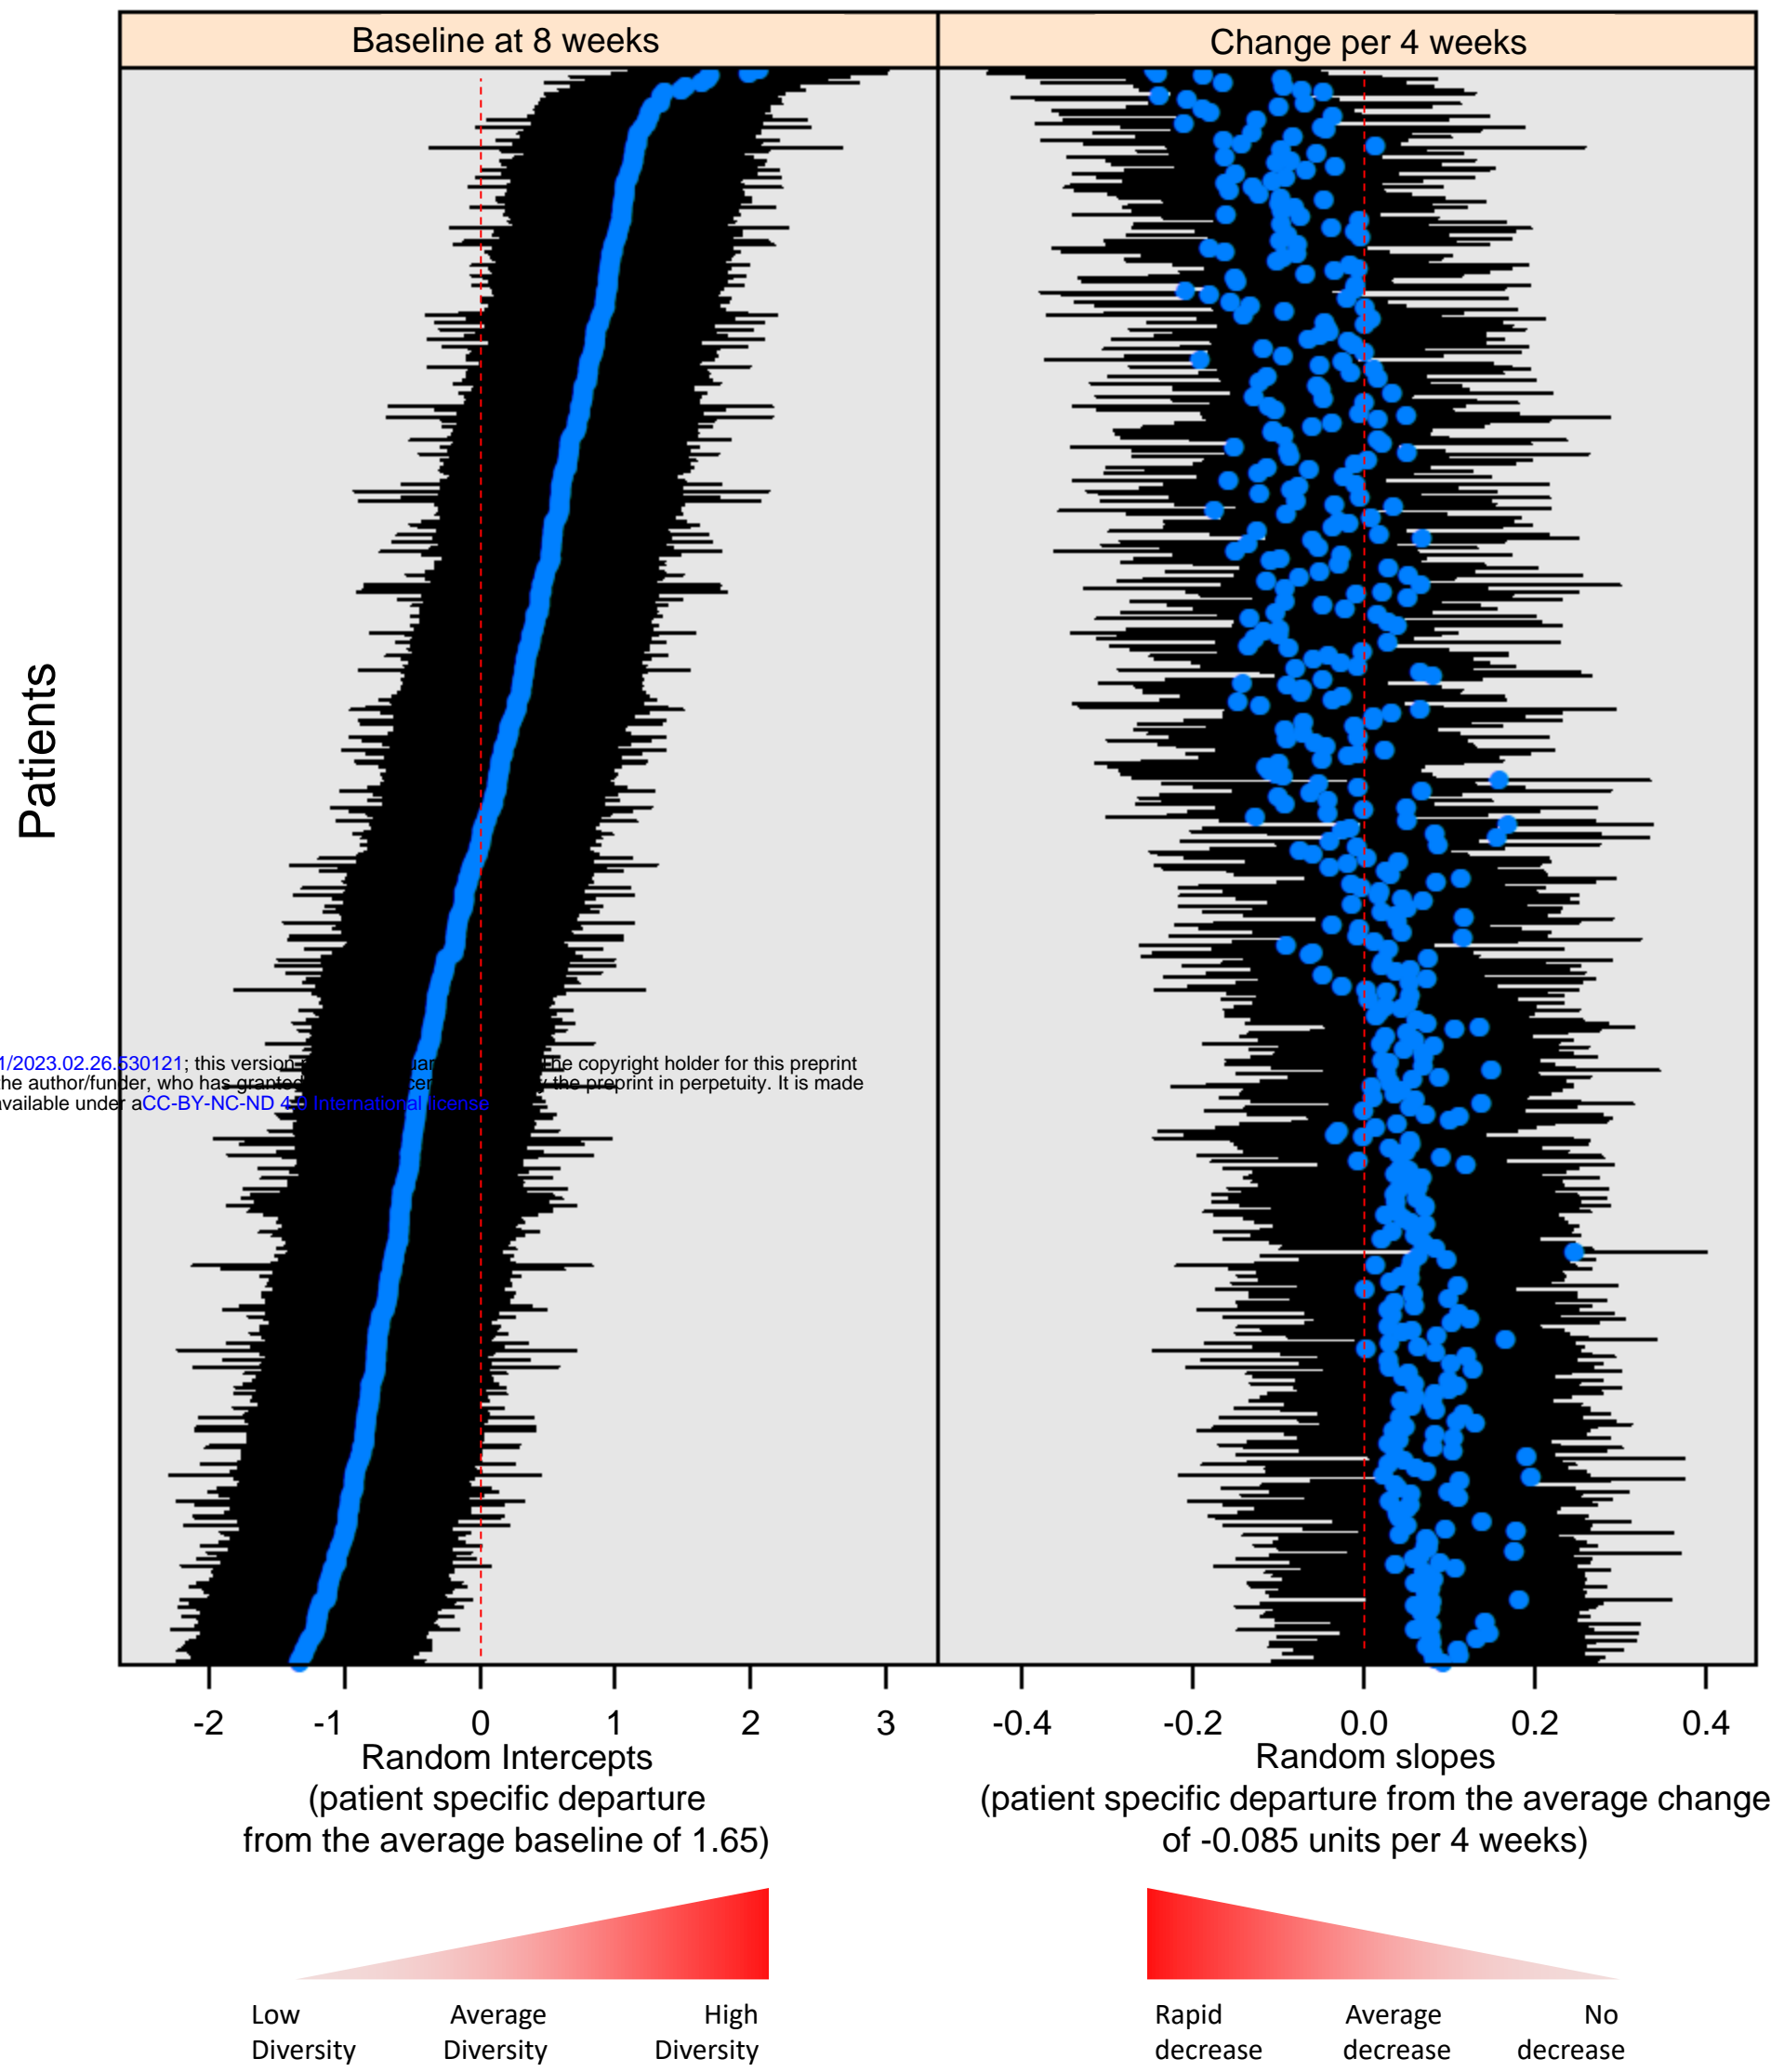

Figure 4

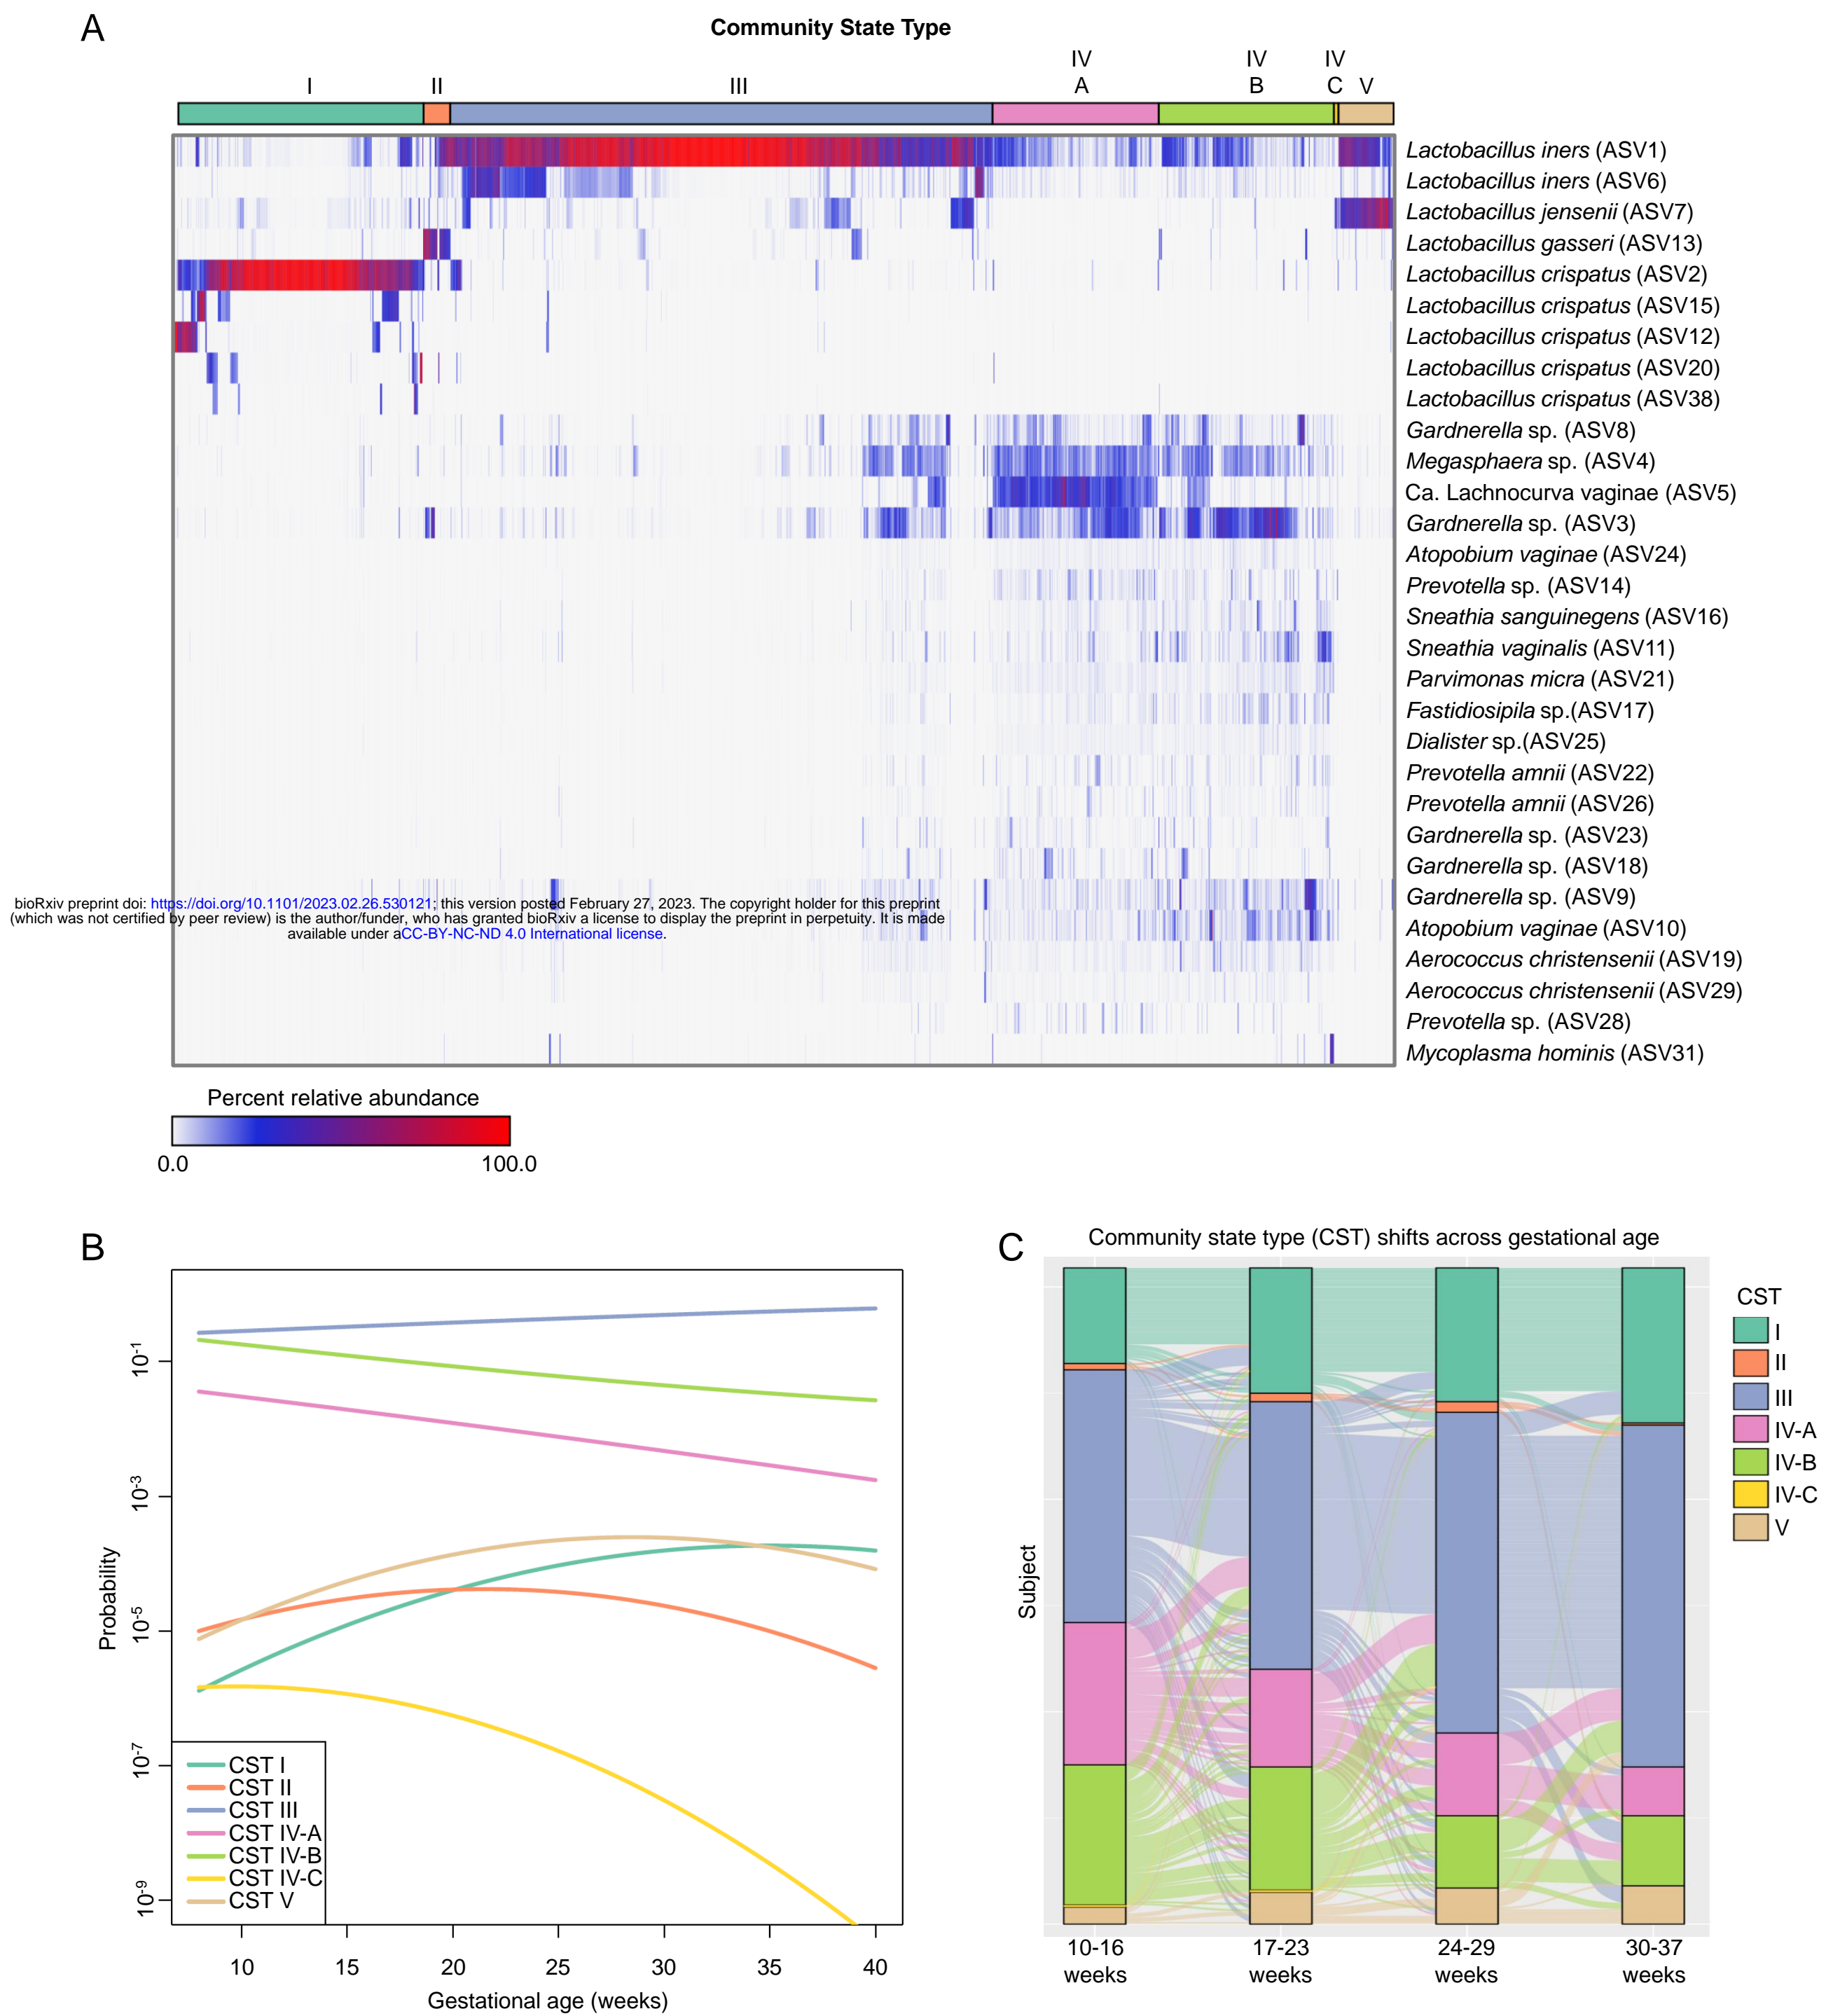

Figure 5

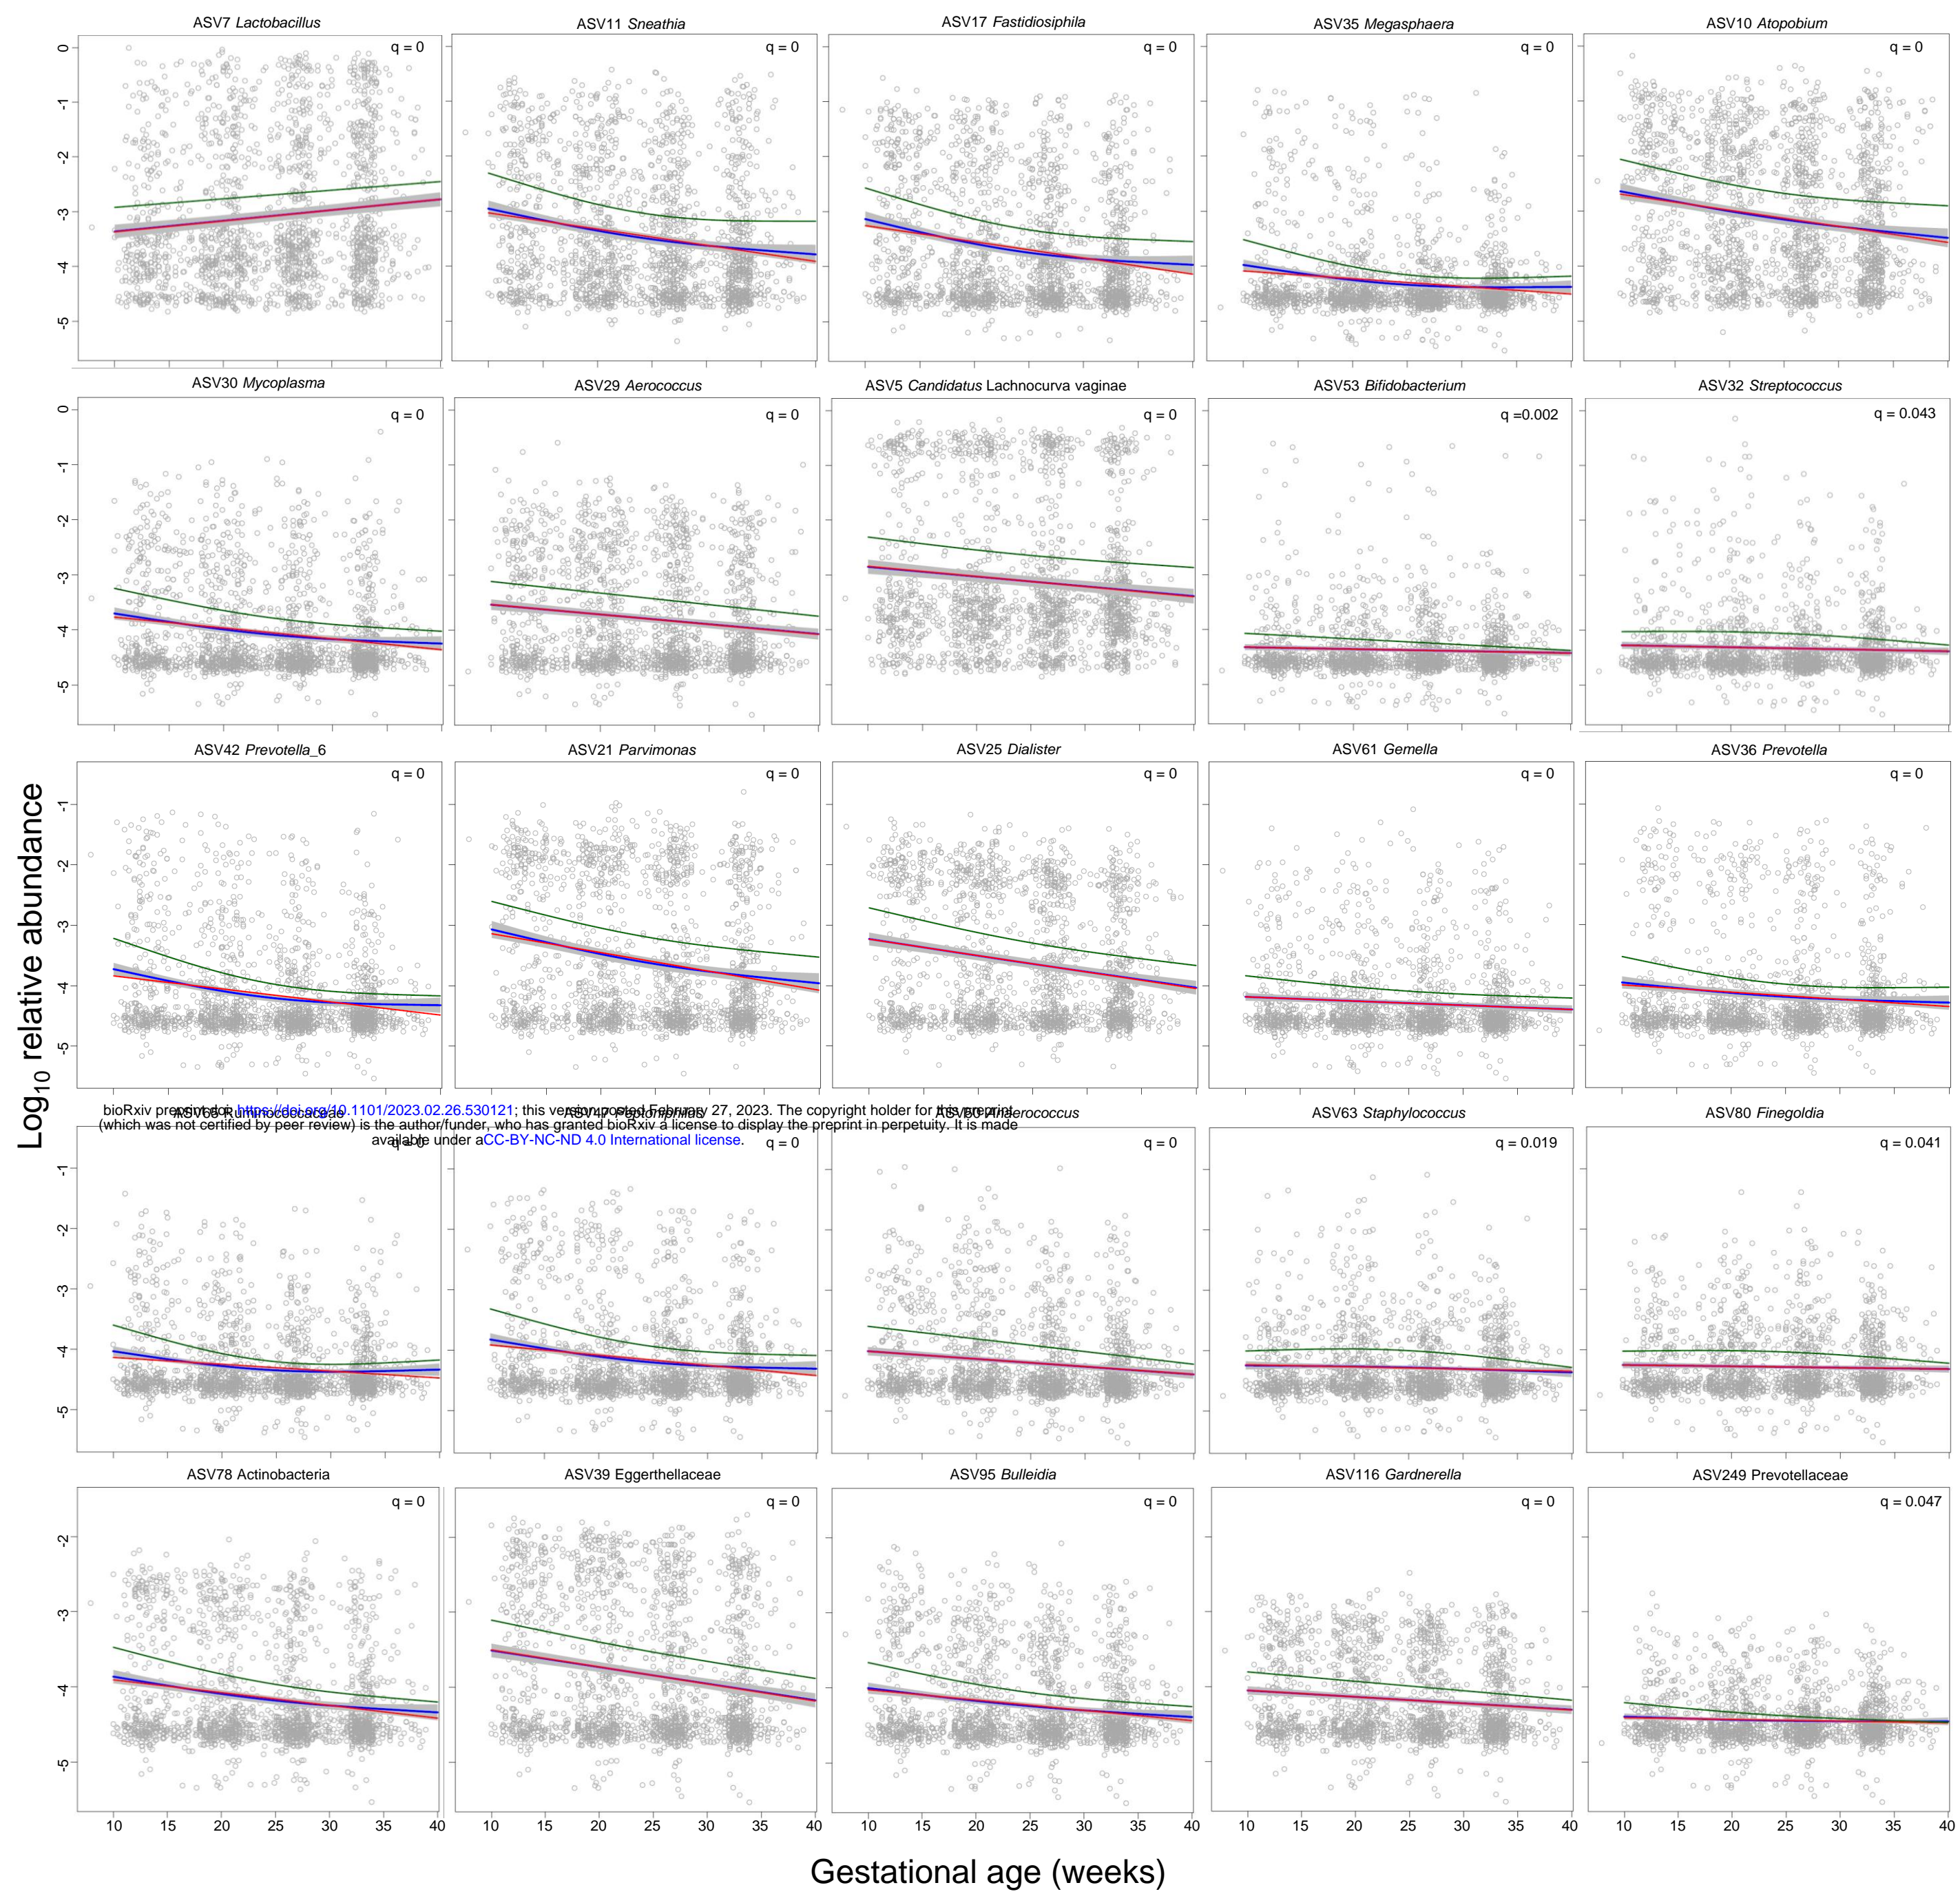



Figure 6

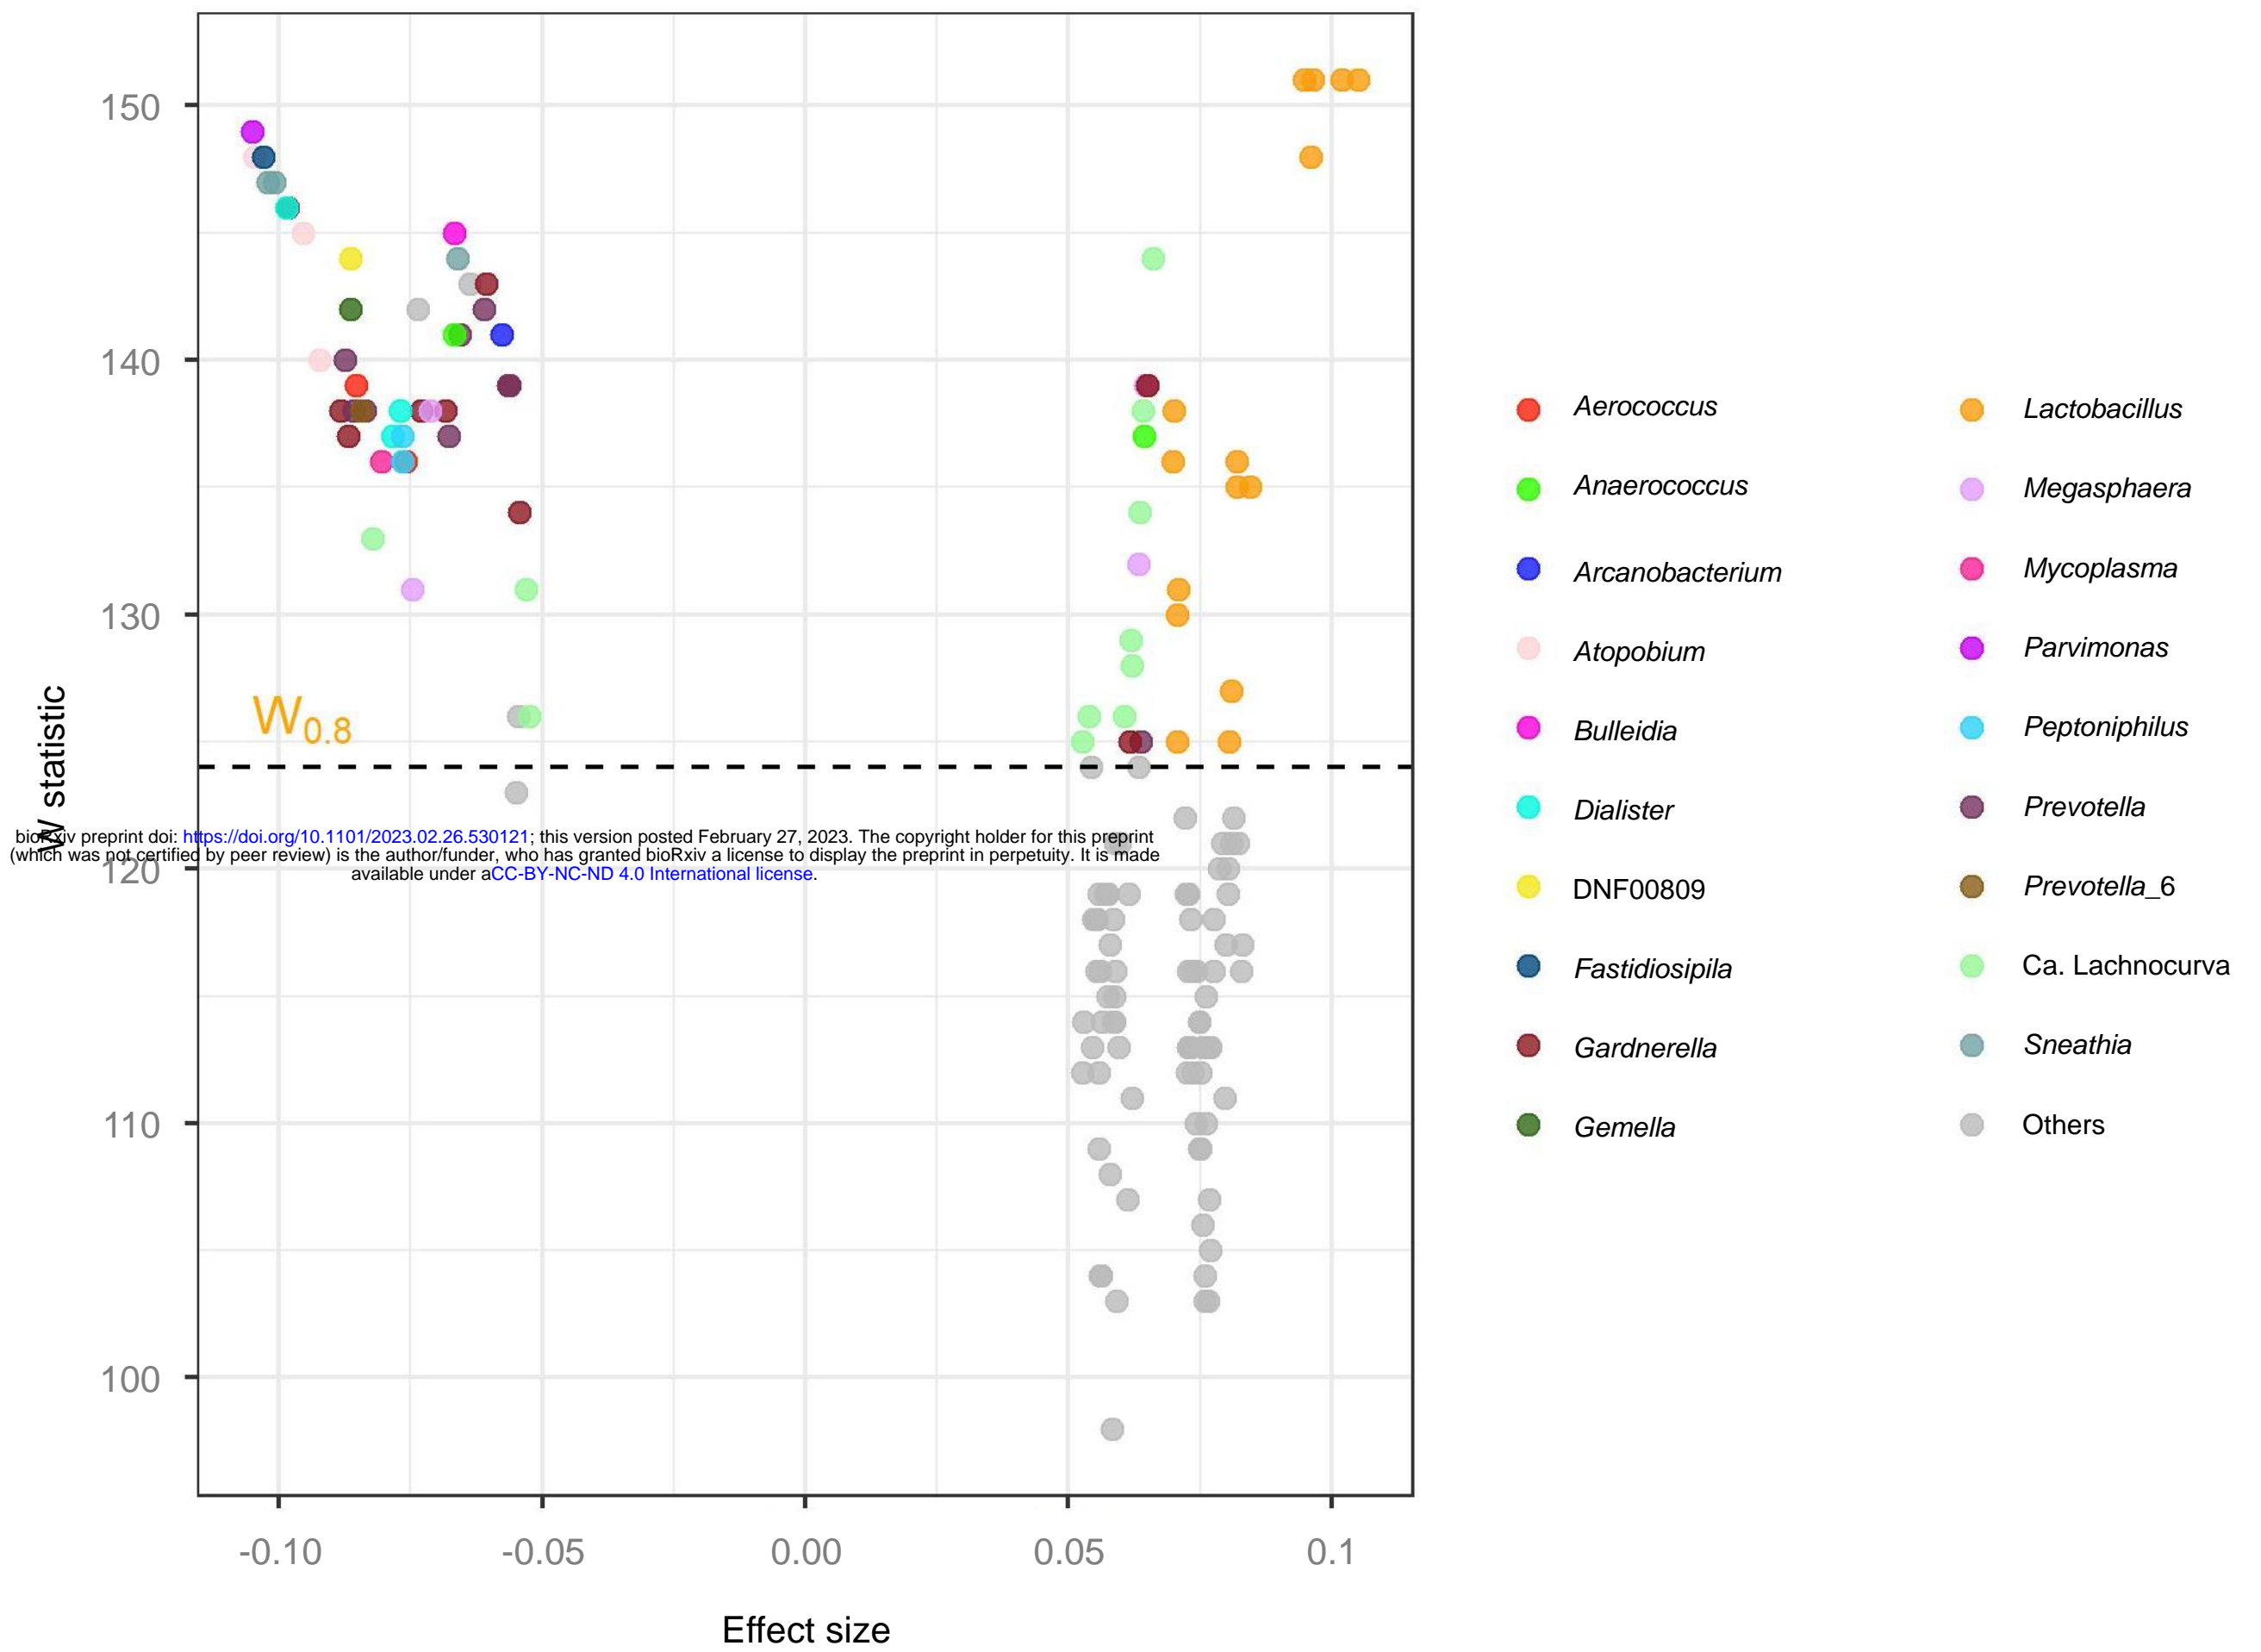

Figure 7

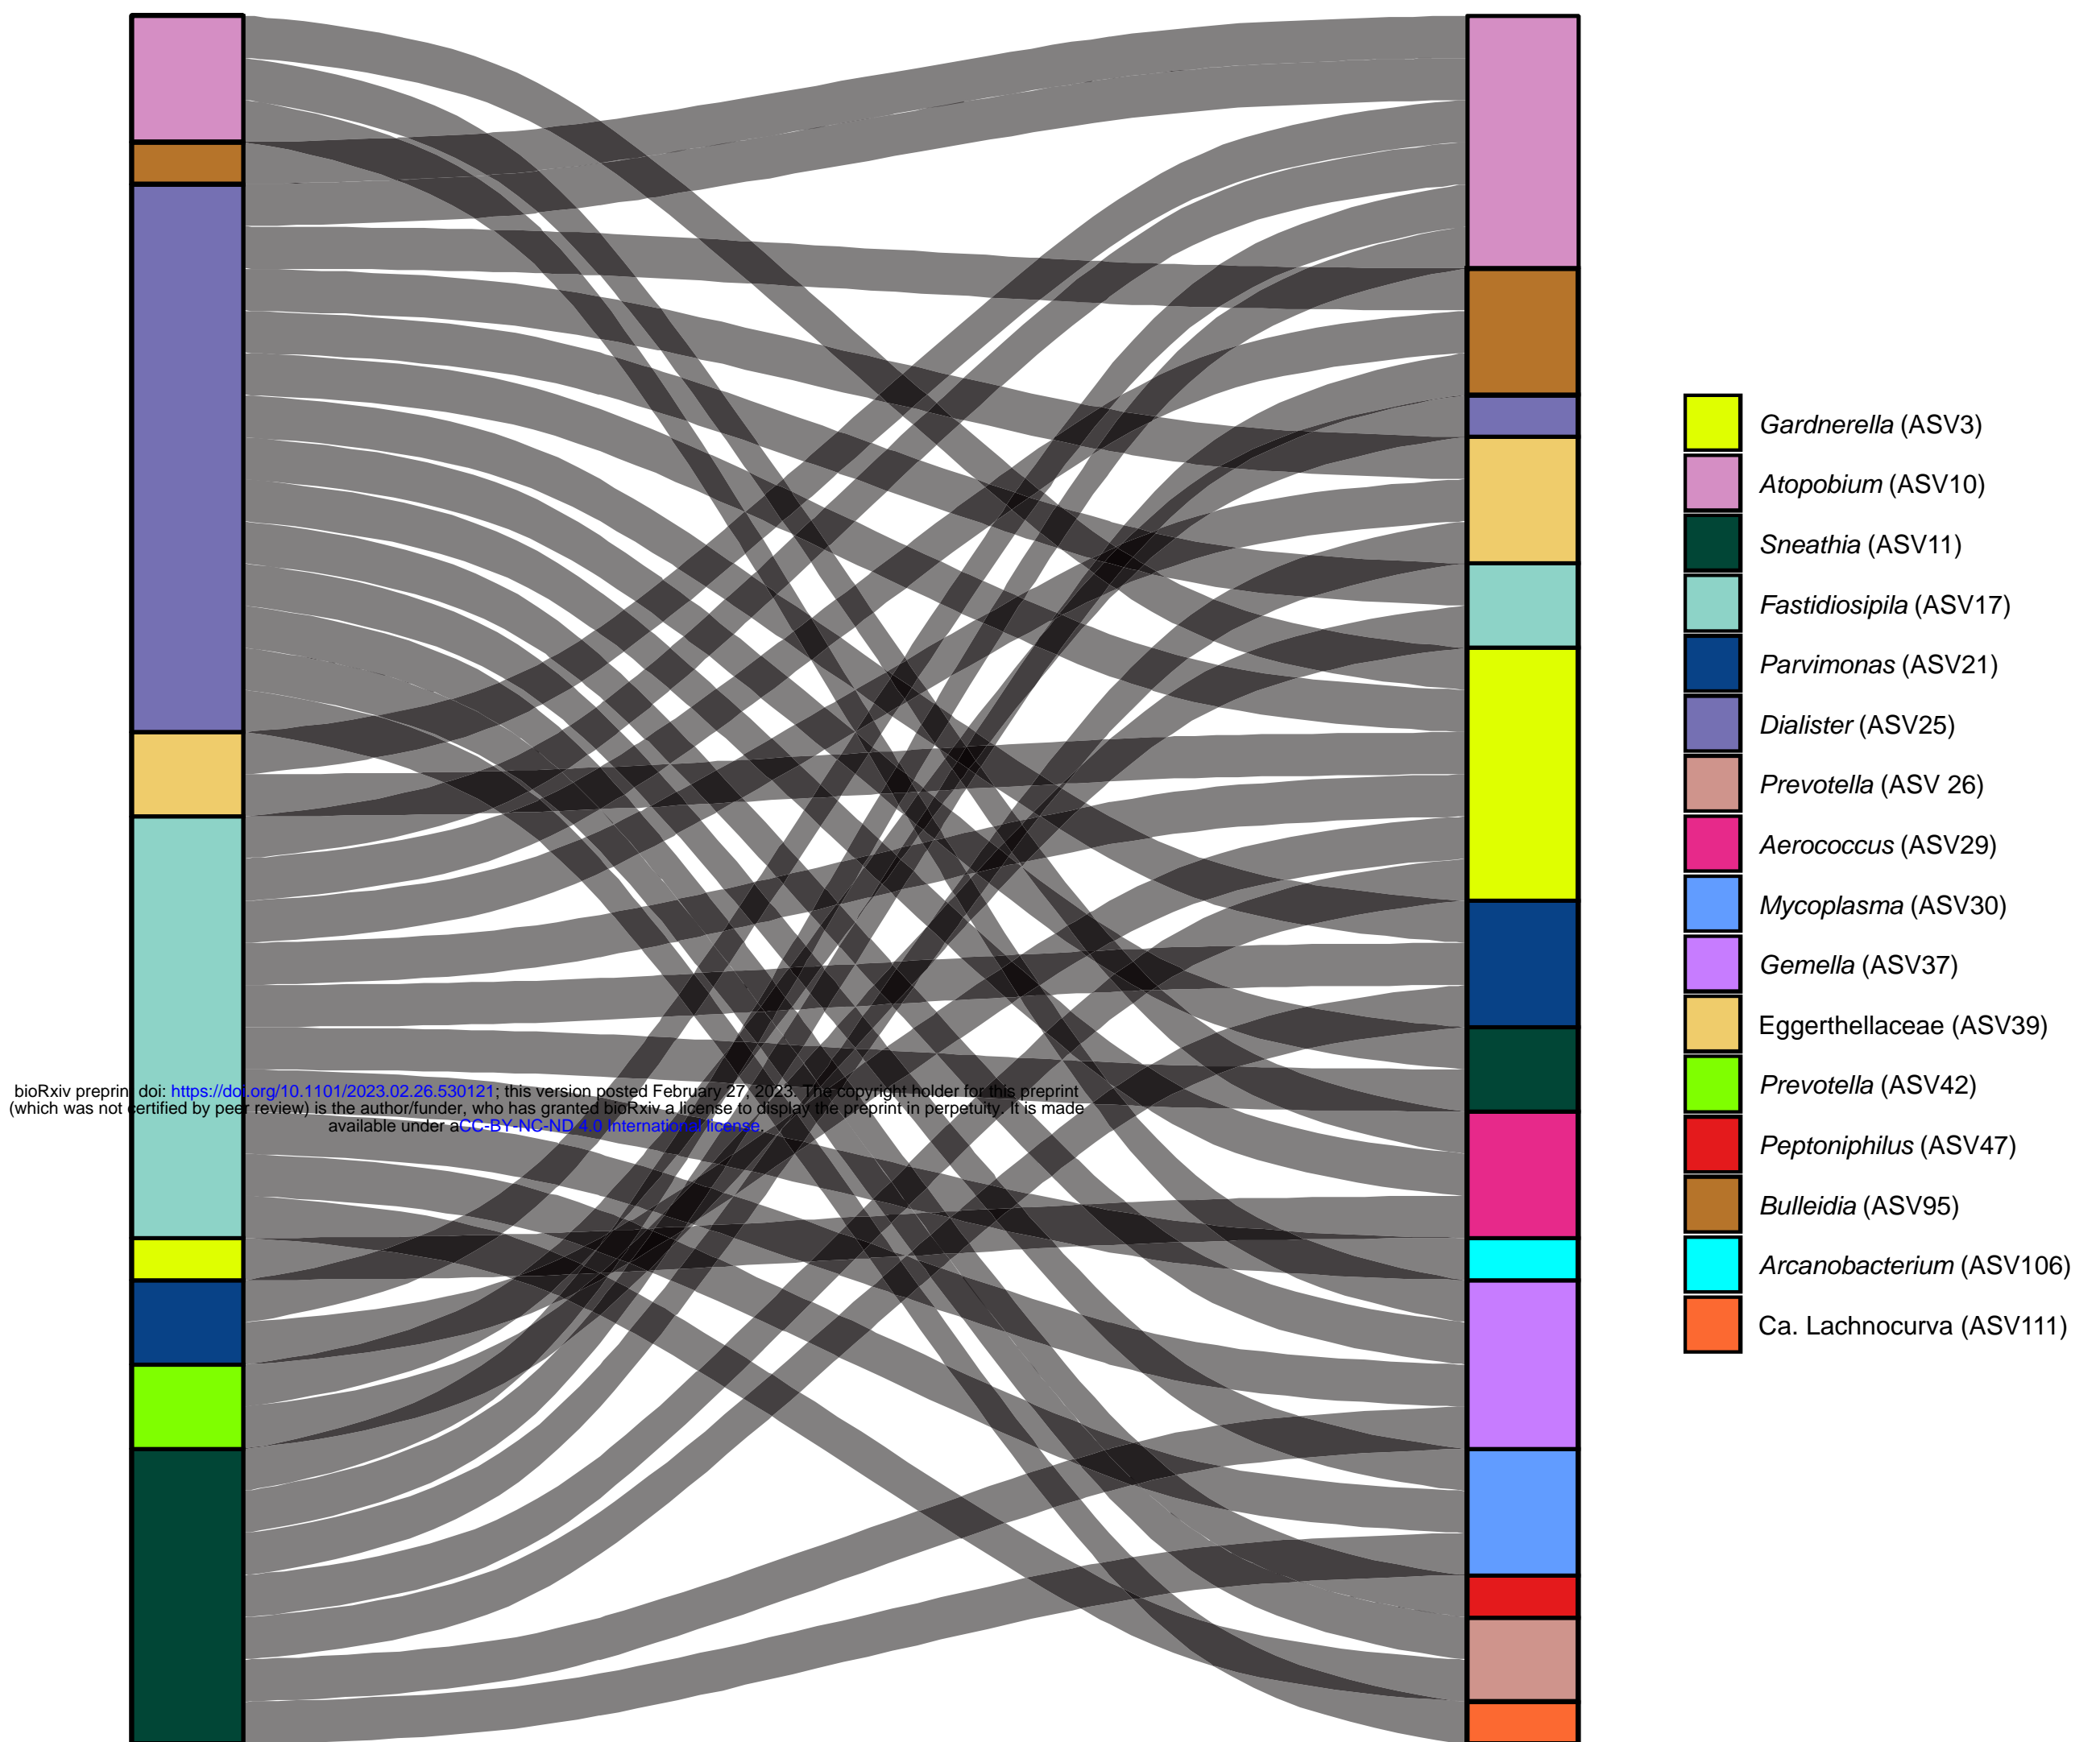

Figure 8

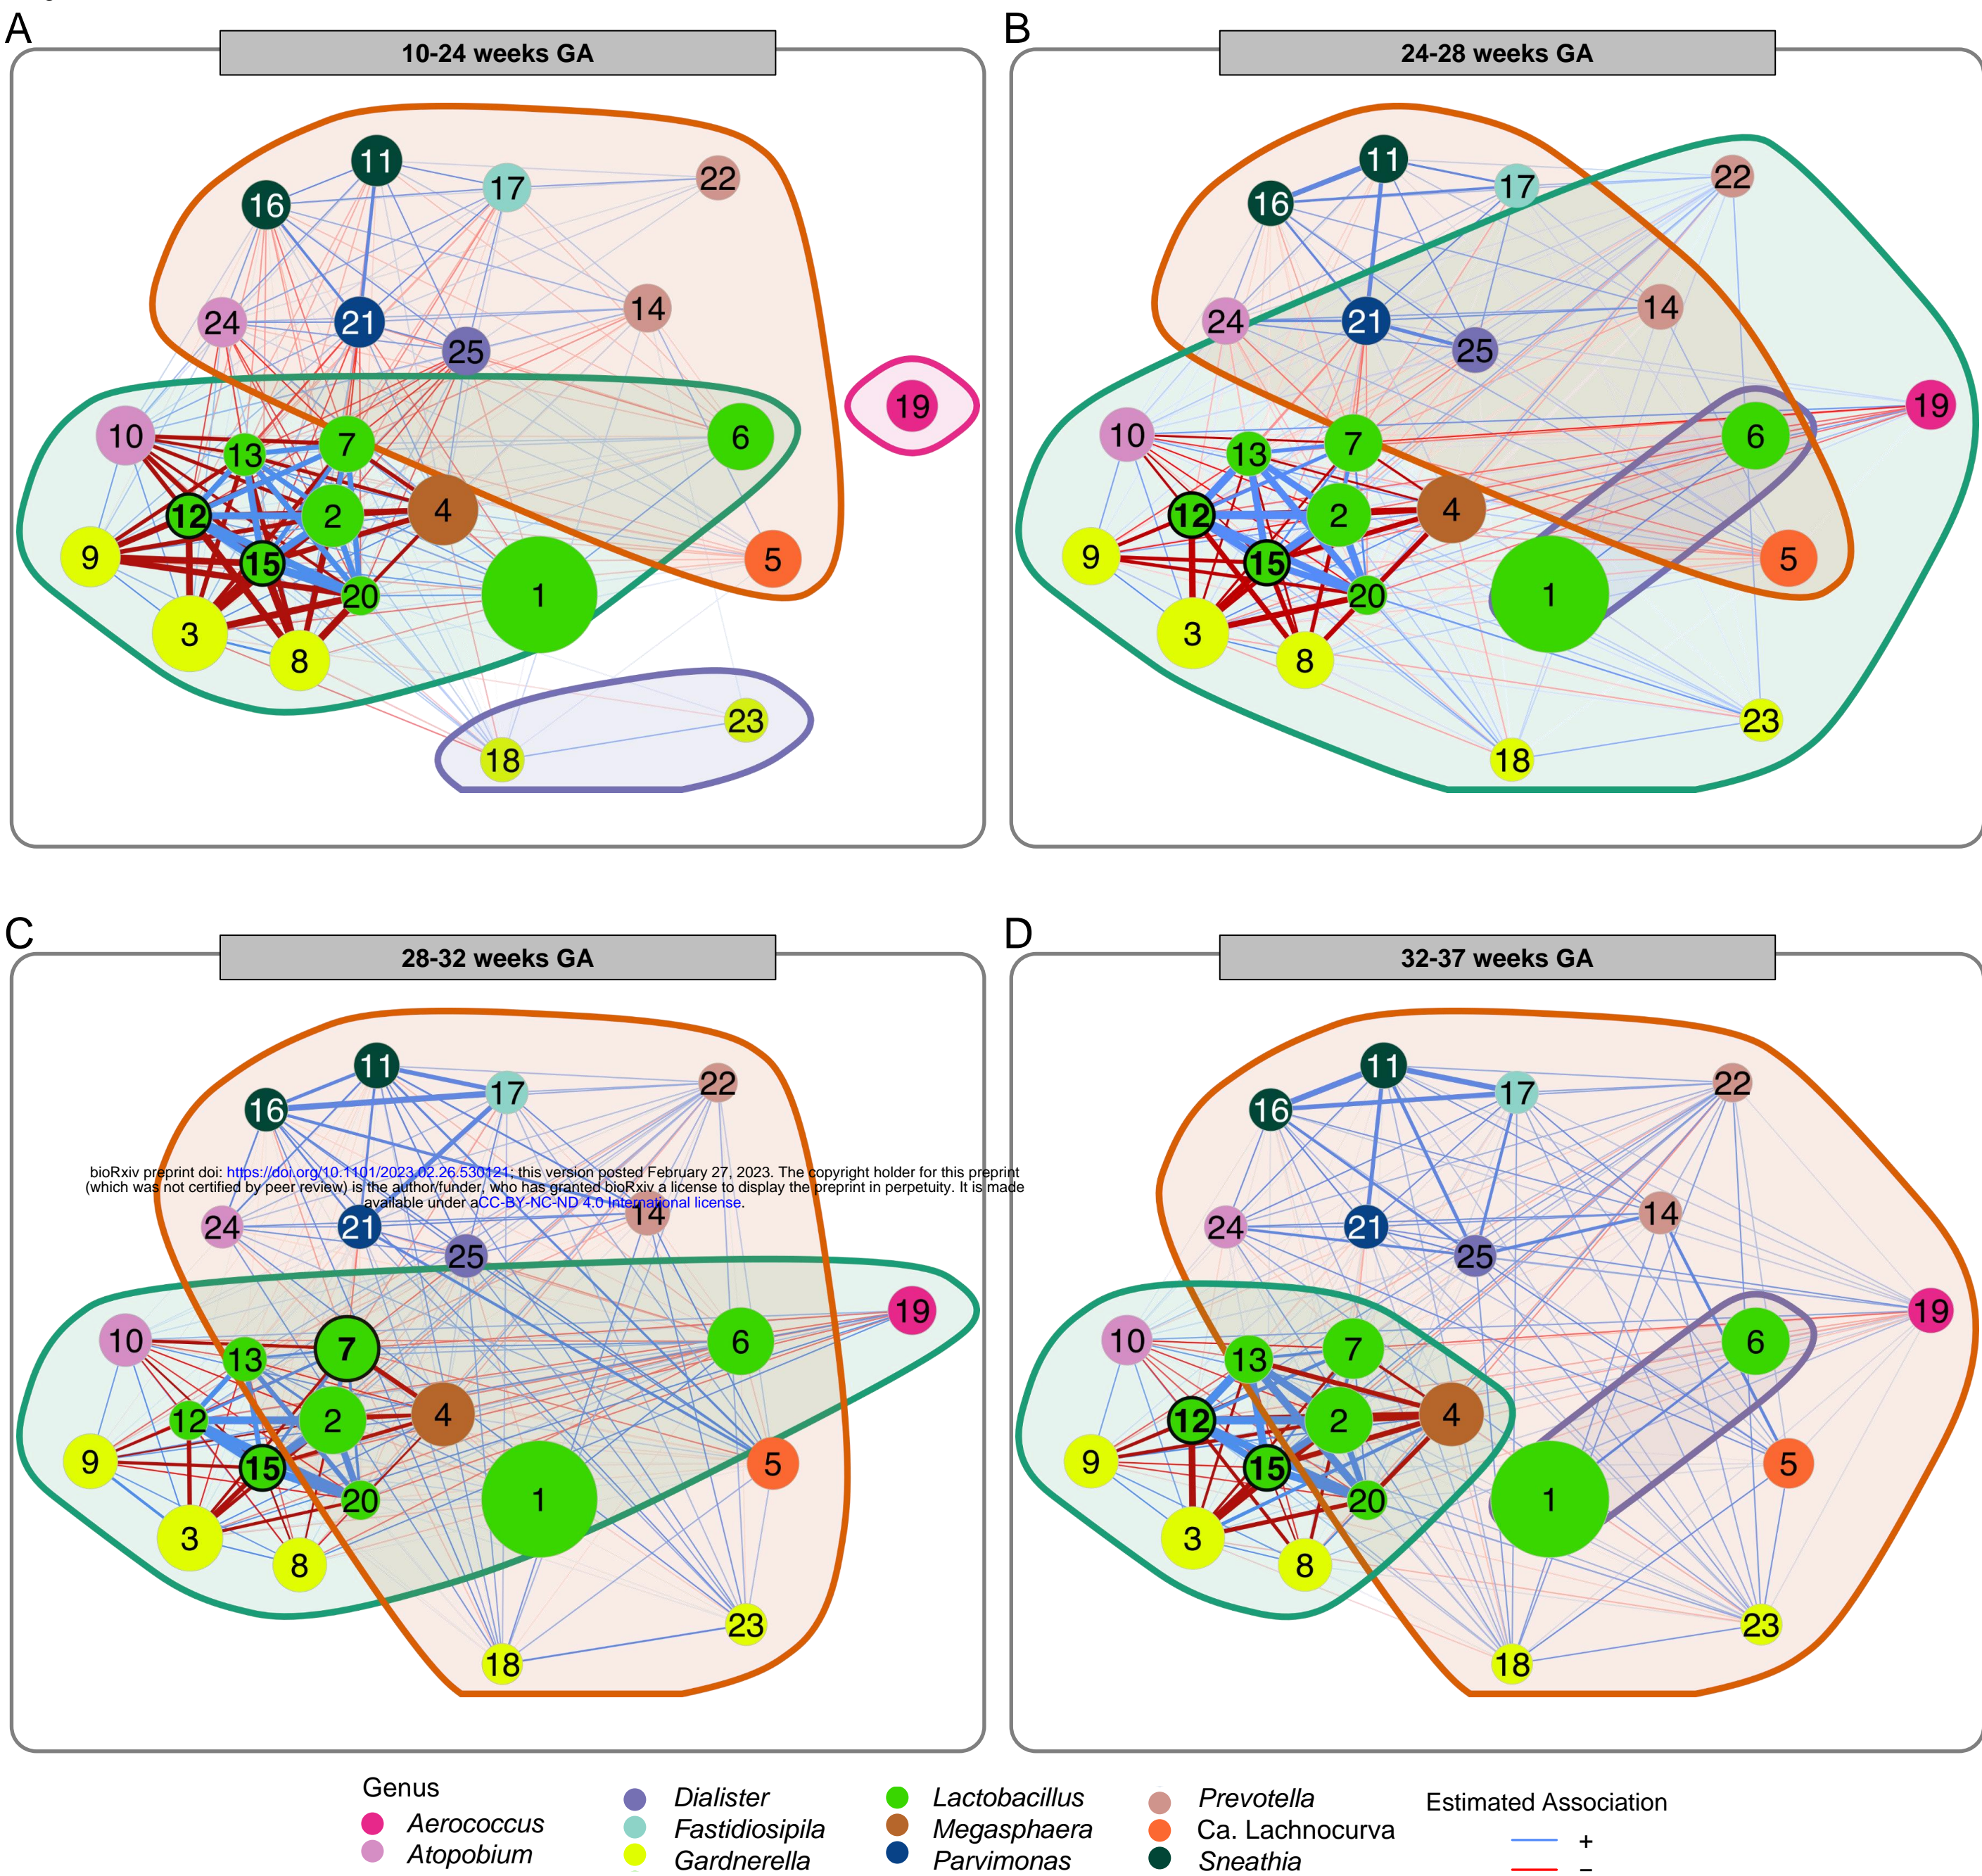

E

|                           | Positive Edge Percentage |             |             |             |
|---------------------------|--------------------------|-------------|-------------|-------------|
|                           | 10-24 weeks              | 24-28 weeks | 28-32 weeks | 32-37 weeks |
| 10-24 weeks               |                          | 8.25697     | 16.423      | 21.04605    |
| 24-28 weeks               | -0.05114                 |             | 8.16603     | 12.78908    |
| 28-32 weeks               | -0.06905                 | -0.01791    |             | 4.62305     |
| 32-36 <sup>+6</sup> weeks | -0.08177                 | -0.03063    | -0.01272    |             |

Natural Connectivity
